# Supplementary material for: The spatial dependence of intervalence charge transfer in an electroactive metal–organic framework
Source: Royal Society of Chemistry journal article supplement (doi:10.1039/d3ma00770g), 2024-01-01
Supplement: d3ma00770g1.pdf [file d3ma00770g1.pdf]

## Supporting Information for

### Quantification of the IVCT and their structure dependence in a cofacial metal-organic framework

Eleanor R. Kearns,<sup>a,b</sup> Bun Chan,<sup>c</sup> Hunter J. Windsor,<sup>b</sup> William Lewis,<sup>d</sup> and Deanna M. D'Alessandro<sup>a,b\*</sup>

<sup>a</sup> School of Chemical & Biomolecular Engineering, Faculty of Engineering, The University of Sydney, New South Wales, 2006, Australia.

<sup>b</sup> School of Chemistry, Faculty of Science, The University of Sydney, New South Wales, 2006, Australia.

<sup>c</sup> Graduate School of Engineering, Nagasaki University, Bunkyo 1-14, Nagasaki 852-8521, Japan

<sup>d</sup> Sydney Analytical Core Research Facility, The University of Sydney, New South Wales, 2006, Australia.

\*Email: [deanna.dalessandro@sydney.edu.au](mailto:deanna.dalessandro@sydney.edu.au)

## Experimental

### General Methods

Solution-state <sup>1</sup>H and <sup>13</sup>C NMR spectra were recorded on a Bruker AVANCEIII 300 MHz spectrometer at 298 K. Deuterated solvents were obtained from Cambridge Stable Isotopes and were used as received with the chemical shifts (δ) referenced internally to the residual solvent resonances and quoted in ppm. PXRD data were collected with a PANalytical X'Pert PRO diffractometer producing Cu-Kα (λ = 1.5406 Å) radiation and equipped with a solid state PIXcel detector. Mass spectrometry was performed at the Mass Spectrometry Analysis Facility at the University of Sydney on a Bruker amaZon SL mass spectrometer. Elemental microanalysis was carried out at the Chemical Analysis Facility – Element Analysis Service in the Department of Chemistry and Biomolecular Science at Macquarie University, Australia.

### Electrochemistry

Solid state electrochemical measurements were performed using a BASi Epsilon Electrochemical Analyser. A three electrode set up was employed using a glassy carbon working electrode, a Pt wire counter electrode, and a Ag/Ag<sup>+</sup> quasi-reference electrode. A 0.1 M TBAPF<sub>6</sub>/MeCN electrolyte was made and degassed with Argon prior to use. Solid samples were mechanically immobilized on the GC working electrode by grinding the electrode into a paste of the sample. Ferrocene was used as an internal standard at the end of each experiment. All values are quoted relative to the Fc/Fc<sup>+</sup> redox couple.

### UV-Vis-NIR Spectroelectrochemistry

A Cary 5000 Spectrophotometer equipped with a Harrick OmniDiff probe attachment was used to carry out UV-Vis-NIR spectroelectrochemistry. A Teflon spectroelectrochemical cell equipped with a platinum wire reference electrode, a silver wire auxiliary electrode, and an ITO coated glass cover slip as the working electrode. Solid sample was immobilized on the ITO cover slip using Teflon tape and conductive copper tape. The applied potential was controlled using eDAQ e-corder 410 potentiostat. A TBAPF<sub>6</sub>/MeCN 0.1 M electrolyte was used for all measurements. Data was reported as the Kubelka-Munk transform, where  $F(R) = (1-R^2)$  (R is the diffuse reflectance of the sample relative to the baseline).

## **EPR Spectroelectrochemistry**

Solid state EPR-SEC data were collected on a Bruker EMXnano EPR spectrometer. For organic radicals, microwave attenuation was set to 8 dB and receiver gain was tuned to prevent signal saturation. The EPR SEC cell was constructed from a Pasteur pipette flame sealed at the thin end, filled to half-way with 0.1 M TBAPF<sub>6</sub>/MeCN electrolyte. Three electrodes connected to separate Cu wire inserts, held in place and isolated from each other with Teflon tape, were then immersed into the electrolyte, in a staggered fashion, featuring a short bare Pt counter electrode (0.125 mm) with a medium length Teflon coated Ag/Ag<sup>+</sup> quasi-reference electrode (0.18 mm coated) and a long Teflon coated Pt working electrode (0.20 mm coated) that were stripped of their Teflon coating to expose 1 cm of the wire. The tip of the working electrode was connected to a piece of Pt gauze encasing the solid sample. EPR scans were run at various potentials controlled using an eDAQ e-corder 410 potentiostat using the same methodology as for Vis-NIR SEC

## **Single crystal x-ray diffraction**

Crystals were transferred directly from the mother liquor to a protective oil (paratone-N) before being mounted onto a 20 µm nylon loop affixed to a goniometer head. Single crystal X-ray diffraction data was collected, with assistance from Dr William Lewis, on an Agilent Technologies SuperNova diffractometer or on a Bruker diffractometer using Cu-K $\alpha$  ( $\lambda = 1.5406 \text{ \AA}$ ) radiation. Samples were cold-mounted over a dry ice environment and collections taken at 100 K under a stream of N<sub>2</sub>, produced by an Oxford Cryostems 700 Plus cryostream. Data reduction, integration and absorption corrections were performed using the CrysAlisPro<sup>1</sup> software for the SuperNova collections and SAINT<sup>+2</sup> (part of the APEX2 software) for APEX II collections. Structure solutions were determined using SHELXT<sup>3</sup> and refined using either SHELXL<sup>4</sup> or OLEX.<sup>5</sup> Structure illustrations were produced using CrystalMaker 10.0.1.<sup>6</sup> Crystallographic data tables for all materials are located in the supplementary information.

## **Single Crystal UV-Vis Spectroscopy**

Polarised single crystal UV-Vis spectroscopy was performed using a customized spectrophotometer. The apparatus was composed of optics obtained from a CARY14 spectrophotometer equipped with a 24 V/150W quartz halogen lamp and a Spec 1704, 1 m, high resolution Czerny-Turner monochromator with 500, 1000, and 1600 nm gratings and a fitted high speed stepped motor. A single crystal was mounted over a 1 mm aperture and data were collected over a 300-650 nm energy range in both horizontal and vertical polarisation modes. A baseline correction was applied to the data by measuring the absorbance spectra of the empty aperture, which was then manually subtracted from the absorption spectra of the crystal.

## **Molecular Orbital Calculations**

Standard computational chemistry calculations were carried out with Gaussian 16.<sup>1</sup> Geometries were obtained from the experimental crystal structure. The stacked dimer models used in the calculations have the terminal pyridines replaced by benzenes. This is to avoid the participation of the nitrogen lone pairs in the reactions or excitations that are being investigated; presumably, such lone pairs are tied up by the coordinated Cd<sup>2+</sup> cations in the actual framework environment. Electronic excitation spectra were calculated with the CAM-B3LYP<sup>2</sup> density functional theory method, in conjunction with the 6-31G(d)<sup>3</sup> basis set. We use the long-range corrected<sup>4</sup> CAM-B3LYP method to ensure the proper description of any prospective charge-transfer excitations. The choice of using the 6-31G(d) basis set is based on our previous studies,<sup>5,6</sup> which show that it provides an efficient and adequate means to account for the relative absorption

energies. The Tamm-Dancoff approximation<sup>7</sup> was applied to further accelerate the computation of the electronic excited states with minimal loss of accuracy.

## Elemental Analysis

Prior to elemental analysis (EA) the samples were solvent exchanged in EtOH for several days. C, H, N, S analysis was carried out at the Chemical Analysis Facility – Element Analysis Service in the Department of Chemistry and Biomolecular Science at Macquarie University, Australia.

## Additional Synthetic Details

**General Synthetic Procedure for Py<sub>2</sub>TTF containing Frameworks:** Cd(NO<sub>3</sub>)<sub>2</sub>·4H<sub>2</sub>O (11 mg, 0.036 mmol) was dissolved in ethanol (0.75 mL) by sonication. Separately, solutions of Py<sub>2</sub>TTF (13.5 mg, 0.0376 mmol) in DMF (1.0 mL) and the respective coligand (0.0375 mmol) in DMF (1.5 mL) were prepared in the absence of light. Once fully solubilised the three solutions were combined into a single vial, sonicated briefly and heated at 90 °C for 48 hours in the absence of light. The following frameworks were synthesized using the above procedure.

**1 (Cd(Py<sub>2</sub>TTF)<sub>2</sub>(bpdc)<sub>2</sub>):** Cd(NO<sub>3</sub>)<sub>2</sub>·4H<sub>2</sub>O (11 mg, 0.036 mmol) was reacted with Py<sub>2</sub>TTF (13.5 mg, 0.0376 mmol) and 4,4'-biphenyldicarboxylic acid (**bpdc**) (9.10 mg, 0.0376 mmol). Framework **1** was obtained as dark-red, plate-like crystals (15.45 mg, 0.0171 mmol, 46 %). Elemental Analysis: Calculated (%) C 49.96 N 3.88 H 2.51 S 17.78. Found (%) C 50.40 N 4.12 H 3.062 S 17.028. Deviation is likely caused by the presence of 0.25 DMF and 0.5 EtOH molecules per asymmetric unit. Calculated EA values with DMF and EtOH included (%) C 50.01 N 4.13 H 3.01 S 16.81.

**2 (Cd(Py<sub>2</sub>TTF)<sub>2</sub>(stil)<sub>2</sub>):** Cd(NO<sub>3</sub>)<sub>2</sub>·4H<sub>2</sub>O (11 mg, 0.036 mmol) was reacted with Py<sub>2</sub>TTF (13.5 mg, 0.0376 mmol) and 4,4'-stilbene dicarboxylic acid (**stil**) (10.08 mg, 0.0376 mmol). Framework **2** was obtained as dark-red, plate-like crystals (11.75 mg, 0.0128 mmol, 34 %). Elemental Analysis: Calculated (%) C 51.44 N 3.74 H 2.70 S 17.16 Found (%) C 51.44 N 3.866 H 3.038 S 17.71. Deviation is likely caused by the presence of 0.25 Py<sub>2</sub>TTF and 2 EtOH molecules per asymmetric unit. Calculated EA values with Py<sub>2</sub>TTF and EtOH included (%) C 51.72 N 3.77 H 3.71 S 17.25.

**3 (Cd(Py<sub>2</sub>TTF)<sub>2</sub>(oba)<sub>2</sub>):** Cd(NO<sub>3</sub>)<sub>2</sub>·4H<sub>2</sub>O (11 mg, 0.036 mmol) was reacted with Py<sub>2</sub>TTF (13.5 mg, 0.0376 mmol) and 4,4'-oxybisbenzoic acid (**oba**) (9.71 mg, 0.0376 mmol). Framework **3** was obtained as dark-red, plate-like crystals (19.50 mg, 0.0211 mmol, 57 %). Elemental Analysis: Calculated (%) C: 48.88 N: 3.80 H: 2.46 S: 17.39 Found (%) C: 49.54 N: 4.94 H: 4.86 S: 15.642. Deviation is likely caused by the presence of 1 DMF and 0.5 EtOH molecules per asymmetric unit. Calculated EA values with DMF and EtOH included (%) C 49.00 N 5.04 H 3.74 S 17.25.

**4 (Cd(Py<sub>2</sub>TTF)<sub>2</sub>(Schiff)<sub>2</sub>):** Cd(NO<sub>3</sub>)<sub>2</sub>·4H<sub>2</sub>O (11 mg, 0.036 mmol) was reacted with Py<sub>2</sub>TTF (13.5 mg, 0.0376 mmol) and 4-[[[(4-Carboxyphenyl)imino]methyl]benzoic acid (**schiff**) (9.71 mg, 0.0376 mmol). Framework **4** was obtained as dark-red, plate-like crystals (19.50 mg, 0.021 mmol, 57 %) Elemental Analysis: Calculated (%) C 49.63 N 5.60 H 2.82 S 17.09 Found (%) C 50.42 N 5.56 H 2.58 S 17.20. Deviation is likely caused by the presence of 0.25 EtOH molecules per asymmetric unit. Calculated EA values with EtOH included (%) C 49.67 N 5.51 H 2.97 S 16.83.

**General Synthetic Procedures for Py<sub>2</sub>Ph<sub>2</sub>TTF containing frameworks:** Cd(NO<sub>3</sub>)<sub>2</sub>·4H<sub>2</sub>O (7.09 mg, 0.026 mmol) was dissolved in ethanol (0.75 mL) by sonication. Separately, solutions of Py<sub>2</sub>Ph<sub>2</sub>TTF (13.5 mg, 0.026 mmol) in DMF (2.0 mL) and the respective coligand (0.026 mmol) in DMF (1.5 mL) were prepared in the absence of light. Once fully solubilised the three solutions were combined into a single vial, sonicated briefly and heated at 90 °C for 48 hours in the absence of light. The following frameworks were synthesized using the above procedure.

**1E [Cd(Py<sub>2</sub>Ph<sub>2</sub>TTF)<sub>2</sub>(bpdC)<sub>2</sub>]:** Cd(NO<sub>3</sub>)<sub>2</sub>·4H<sub>2</sub>O (7.09 mg, 0.026 mmol) was reacted with Py<sub>2</sub>Ph<sub>2</sub>TTF (13.5 mg, 0.026 mmol) and 4,4'-biphenyldicarboxylic acid (**bpdC**) (6.29 mg, 0.026 mmol). Framework **1E** was obtained as dark-red, plate-like crystals (2.96 mg, 0.00286 mmol, 11 %). Elemental Analysis: Calculated (%) C 57.76 N 3.20 H 3.00 S 14.68. Found (%) C 58.45 N 3.61 H 3.307 S 14.37.

**3E [Cd(Py<sub>2</sub>Ph<sub>2</sub>TTF)<sub>2</sub>(oba)<sub>2</sub>]:** Cd(NO<sub>3</sub>)<sub>2</sub>·4H<sub>2</sub>O (7.09 mg, 0.026 mmol) was reacted with Py<sub>2</sub>Ph<sub>2</sub>TTF (13.5 mg, 0.026 mmol) and 4,4'-oxybisbenzoic acid (**oba**) (6.71 mg, 0.026 mmol). Framework **3E** was obtained as dark-red, plate-like crystals (3.459 mg, 0.00364 mmol, 14 %). Elemental Analysis: Calculated (%) C: 56.72 N: 3.15 H: 2.94 S: 14.42. Found (%) C: 56.72 N: 3.02 H: 2.93 S: 14.32.

### Crystallography

Crystals were transferred directly from the mother liquor to a protective oil (paratone-N) before being mounted onto a 20 µm nylon loop affixed to a goniometer head. Single crystal X-ray diffraction data was collected, with assistance from Dr William Lewis, on an Agilent Technologies SuperNova diffractometer or on a Bruker diffractometer using Cu-K<sub>α</sub> (λ = 1.5406 Å) radiation. Samples were cold-mounted over a dry ice environment and collections taken at 100 K under a stream of N<sub>2</sub>, produced by an Oxford Cryostems 700 Plus cryostream. Data reduction, integration and absorption corrections were performed using the CrysAlisPro<sup>1</sup> software for the SuperNova collections and SAINT<sup>+2</sup> (part of the APEX2 software) for APEX II collections. Structure solutions were determined, with assistance from Dr William Lewis and Hunter Windsor, using SHELXT<sup>3</sup> and refined using either SHELXL<sup>4</sup> or OLEX.<sup>5</sup> Structure illustrations were produced using CrystalMaker 10.0.1.<sup>6</sup>

**Table S1 Crystal data and structure refinement for 1E (Deposition Number 2156708).**

|                                             |                                                                                |
|---------------------------------------------|--------------------------------------------------------------------------------|
| Identification code                         | dmd21_s2313_sn829_a                                                            |
| Empirical formula                           | C <sub>42</sub> H <sub>26</sub> CdN <sub>2</sub> O <sub>4</sub> S <sub>4</sub> |
| Formula weight                              | 863.29                                                                         |
| Temperature/K                               | 100(2)                                                                         |
| Crystal system                              | monoclinic                                                                     |
| Space group                                 | C2/c                                                                           |
| a/Å                                         | 27.8022(14)                                                                    |
| b/Å                                         | 15.8758(5)                                                                     |
| c/Å                                         | 29.3186(14)                                                                    |
| α/°                                         | 90                                                                             |
| β/°                                         | 115.368(6)                                                                     |
| γ/°                                         | 90                                                                             |
| Volume/Å <sup>3</sup>                       | 11692.9(10)                                                                    |
| Z                                           | 8                                                                              |
| ρ <sub>calc</sub> /g/cm <sup>3</sup>        | 0.981                                                                          |
| μ/mm <sup>-1</sup>                          | 4.566                                                                          |
| F(000)                                      | 3488.0                                                                         |
| Crystal size/mm <sup>3</sup>                | 0.176 × 0.1 × 0.031                                                            |
| Radiation                                   | Cu Kα (λ = 1.54184)                                                            |
| 2θ range for data collection/°              | 7.038 to 145.406                                                               |
| Index ranges                                | -34 ≤ h ≤ 32, -19 ≤ k ≤ 17, -24 ≤ l ≤ 36                                       |
| Reflections collected                       | 28889                                                                          |
| Independent reflections                     | 11333 [R <sub>int</sub> = 0.1193, R <sub>sigma</sub> = 0.1215]                 |
| Data/restraints/parameters                  | 11333/12/448                                                                   |
| Goodness-of-fit on F <sup>2</sup>           | 1.068                                                                          |
| Final R indexes [I ≥ 2σ (I)]                | R <sub>1</sub> = 0.0843, wR <sub>2</sub> = 0.2396                              |
| Final R indexes [all data]                  | R <sub>1</sub> = 0.1301, wR <sub>2</sub> = 0.2826                              |
| Largest diff. peak/hole / e Å <sup>-3</sup> | 2.33/-1.30                                                                     |

**Table S2 Crystal data and structure refinement for 3 (Deposition Number 2155075).**

|                                             |                                                                                               |
|---------------------------------------------|-----------------------------------------------------------------------------------------------|
| Identification code                         | dmd20_s2180_fr140                                                                             |
| Empirical formula                           | C <sub>60</sub> H <sub>36</sub> Cd <sub>2</sub> N <sub>4</sub> O <sub>10</sub> S <sub>8</sub> |
| Formula weight                              | 1454.21                                                                                       |
| Temperature/K                               | 100.0                                                                                         |
| Crystal system                              | triclinic                                                                                     |
| Space group                                 | P-1                                                                                           |
| a/Å                                         | 9.4350(6)                                                                                     |
| b/Å                                         | 14.9179(10)                                                                                   |
| c/Å                                         | 15.3694(10)                                                                                   |
| α/°                                         | 117.853(2)                                                                                    |
| β/°                                         | 92.999(2)                                                                                     |
| γ/°                                         | 102.297(2)                                                                                    |
| Volume/Å <sup>3</sup>                       | 1839.7(2)                                                                                     |
| Z                                           | 1                                                                                             |
| ρ <sub>calc</sub> /cm <sup>3</sup>          | 1.313                                                                                         |
| μ/mm <sup>-1</sup>                          | 0.855                                                                                         |
| F(000)                                      | 728.0                                                                                         |
| Crystal size/mm <sup>3</sup>                | 0.1 × 0.1 × 0.01                                                                              |
| Radiation                                   | MoKα (λ = 0.71073)                                                                            |
| 2θ range for data collection/°              | 3.044 to 56.562                                                                               |
| Index ranges                                | -12 ≤ h ≤ 12, -19 ≤ k ≤ 17, -16 ≤ l ≤ 20                                                      |
| Reflections collected                       | 37928                                                                                         |
| Independent reflections                     | 9013 [R <sub>int</sub> = 0.0524, R <sub>sigma</sub> = 0.0576]                                 |
| Data/restraints/parameters                  | 9013/0/384                                                                                    |
| Goodness-of-fit on F <sup>2</sup>           | 1.054                                                                                         |
| Final R indexes [I ≥ 2σ (I)]                | R <sub>1</sub> = 0.0498, wR <sub>2</sub> = 0.1151                                             |
| Final R indexes [all data]                  | R <sub>1</sub> = 0.0759, wR <sub>2</sub> = 0.1262                                             |
| Largest diff. peak/hole / e Å <sup>-3</sup> | 3.25/-0.85                                                                                    |

**Table S3 Crystal data and structure refinement for 3E (deposition number 2156707).**

|                                             |                                                                                                        |
|---------------------------------------------|--------------------------------------------------------------------------------------------------------|
| Identification code                         | dmd19ek2_s1900_a                                                                                       |
| Empirical formula                           | C <sub>23.5</sub> H <sub>19.5</sub> Cd <sub>0.5</sub> N <sub>1.5</sub> O <sub>3.5</sub> S <sub>2</sub> |
| Formula weight                              | 499.22                                                                                                 |
| Temperature/K                               | 100.00(10)                                                                                             |
| Crystal system                              | triclinic                                                                                              |
| Space group                                 | P-1                                                                                                    |
| a/Å                                         | 9.6565(3)                                                                                              |
| b/Å                                         | 15.1597(4)                                                                                             |
| c/Å                                         | 18.3062(6)                                                                                             |
| α/°                                         | 104.990(3)                                                                                             |
| β/°                                         | 91.644(3)                                                                                              |
| γ/°                                         | 90.050(2)                                                                                              |
| Volume/Å <sup>3</sup>                       | 2587.47(15)                                                                                            |
| Z                                           | 4                                                                                                      |
| ρ <sub>calc</sub> /cm <sup>3</sup>          | 1.282                                                                                                  |
| μ/mm <sup>-1</sup>                          | 5.278                                                                                                  |
| F(000)                                      | 1020.0                                                                                                 |
| Crystal size/mm <sup>3</sup>                | 0.169 × 0.082 × 0.03                                                                                   |
| Radiation                                   | CuKα (λ = 1.54184)                                                                                     |
| 2θ range for data collection/°              | 8.782 to 146.414                                                                                       |
| Index ranges                                | -11 ≤ h ≤ 11, -18 ≤ k ≤ 18, -22 ≤ l ≤ 22                                                               |
| Reflections collected                       | 40682                                                                                                  |
| Independent reflections                     | 10096 [R <sub>int</sub> = 0.0627, R <sub>sigma</sub> = 0.0510]                                         |
| Data/restraints/parameters                  | 10096/4/487                                                                                            |
| Goodness-of-fit on F <sup>2</sup>           | 1.039                                                                                                  |
| Final R indexes [I ≥ 2σ (I)]                | R <sub>1</sub> = 0.0883, wR <sub>2</sub> = 0.2638                                                      |
| Final R indexes [all data]                  | R <sub>1</sub> = 0.1071, wR <sub>2</sub> = 0.2862                                                      |
| Largest diff. peak/hole / e Å <sup>-3</sup> | 2.55/-1.40                                                                                             |

**Table S4 Crystal data and structure refinement for 4 (deposition number 2235495).**

|                                             |                                                                                                              |
|---------------------------------------------|--------------------------------------------------------------------------------------------------------------|
| Identification code                         | schiff_Py2TTF_Cd_2_a                                                                                         |
| Empirical formula                           | C <sub>25.5</sub> H <sub>25.5</sub> N <sub>25.5</sub> O <sub>25.5</sub> S <sub>25.5</sub> Cd <sub>25.5</sub> |
| Formula weight                              | 4780.94                                                                                                      |
| Temperature/K                               | 100.0                                                                                                        |
| Crystal system                              | monoclinic                                                                                                   |
| Space group                                 | P2/c                                                                                                         |
| a/Å                                         | 21.088(4)                                                                                                    |
| b/Å                                         | 16.683(3)                                                                                                    |
| c/Å                                         | 32.878(7)                                                                                                    |
| α/°                                         | 90                                                                                                           |
| β/°                                         | 101.07(3)                                                                                                    |
| γ/°                                         | 90                                                                                                           |
| Volume/Å <sup>3</sup>                       | 11352(4)                                                                                                     |
| Z                                           | 4                                                                                                            |
| ρ <sub>calc</sub> /cm <sup>3</sup>          | 2.797                                                                                                        |
| μ/mm <sup>-1</sup>                          | 5.190                                                                                                        |
| F(000)                                      | 8772.0                                                                                                       |
| Crystal size/mm <sup>3</sup>                | ? × ? × ?                                                                                                    |
| Radiation                                   | MoKα (λ = 0.71073)                                                                                           |
| 2θ range for data collection/°              | 1.968 to 63.962                                                                                              |
| Index ranges                                | -28 ≤ h ≤ 28, -23 ≤ k ≤ 23, -42 ≤ l ≤ 42                                                                     |
| Reflections collected                       | 199426                                                                                                       |
| Independent reflections                     | 32326 [R <sub>int</sub> = 0.1464, R <sub>sigma</sub> = 0.0900]                                               |
| Data/restraints/parameters                  | 32326/1159/1134                                                                                              |
| Goodness-of-fit on F <sup>2</sup>           | 0.911                                                                                                        |
| Final R indexes [I>=2σ (I)]                 | R <sub>1</sub> = 0.0998, wR <sub>2</sub> = 0.3003                                                            |
| Final R indexes [all data]                  | R <sub>1</sub> = 0.2209, wR <sub>2</sub> = 0.3979                                                            |
| Largest diff. peak/hole / e Å <sup>-3</sup> | 1.55/-0.84                                                                                                   |

**Table S5: Number of electrons removed using the SQUEEZE mask as well as their likely identities.**

| Framework | e <sup>-</sup> removed using SQUEEZE | Likely identity                              |
|-----------|--------------------------------------|----------------------------------------------|
| 1E        | 121                                  | 3.6 × DMF or 2 × DMF and 2 × EtOH            |
| 2         | 30                                   | 1 × DMF                                      |
| 3         | 72                                   | 2 × DMF or 1 × DMF and 1.5 × EtOH            |
| 3E        | None, 1 EtOH and 1 DMF were modelled |                                              |
| 4         | 200                                  | 6 × DMF or 1.5 × Py <sub>2</sub> TTF in pore |

**Table S6: 1<sup>st</sup> Oxidation potential for various frameworks.**

| FRAMEWORK | 1 <sup>ST</sup> OXIDATION POTENTIAL (V) |
|-----------|-----------------------------------------|
| 1-BPDC    | 0.108                                   |
| 1E-BPDC   | 0.072                                   |
| 2-STILL   | 0.164                                   |



3-OBA

0.207

3E-OBA

0.035

4-SCHIFF

0.092

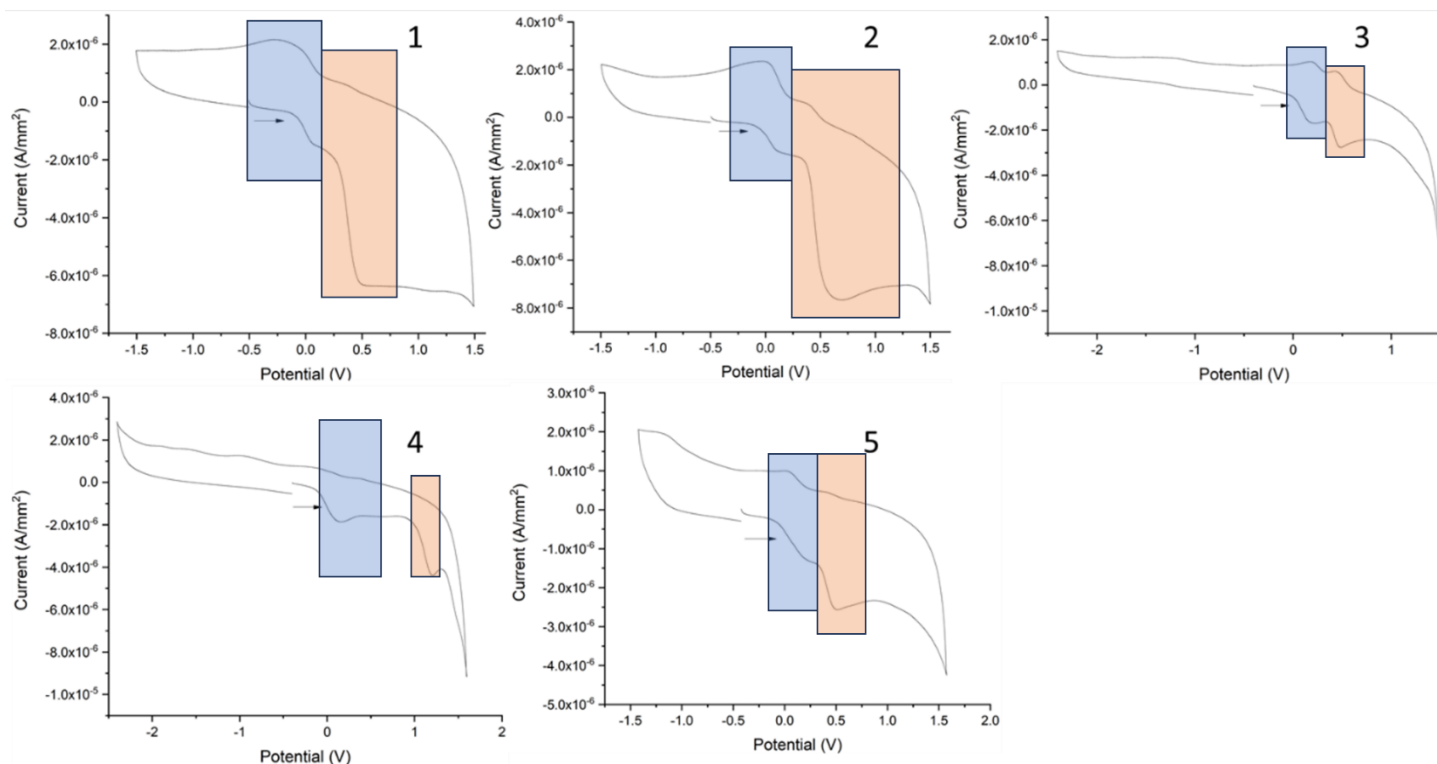

**Figure S1: 200 mVs<sup>-1</sup>Cyclic Voltammograms of 1. [Cd(stil)<sub>2</sub>(Py<sub>2</sub>TTF)<sub>2</sub>] 2.[Cd(Schiff)<sub>2</sub>(Py<sub>2</sub>TTF)<sub>2</sub>], 3.[Cd(oba)<sub>2</sub>(Py<sub>2</sub>TTF)<sub>2</sub>], 4. [Cd(oba)<sub>2</sub>(Py<sub>2</sub>Ph<sub>2</sub>TTF)<sub>2</sub>], 5. [Cd(bpdc)<sub>2</sub>(Py<sub>2</sub>Ph<sub>2</sub>TTF)<sub>2</sub>. The first 1 electron oxidation is highlighted in blue and the second 1 electron oxidation is highlighted in blue.**

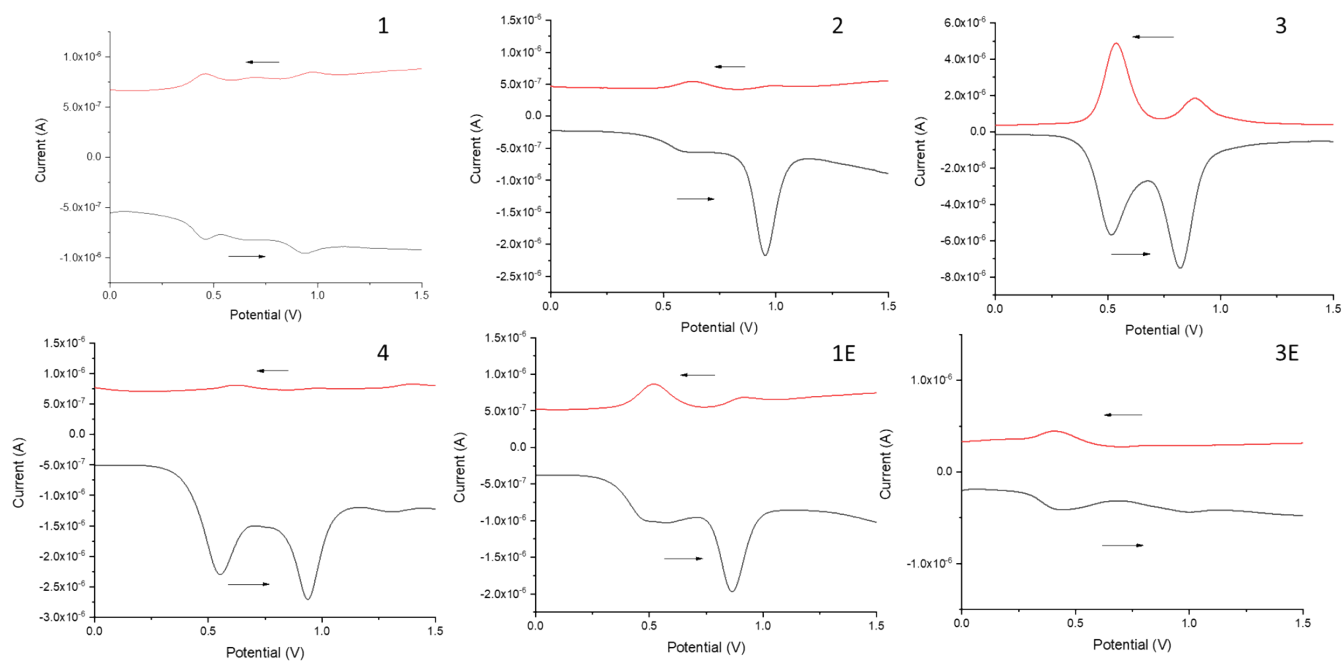

**Figure 2: Square wave voltammograms for the frameworks reported in this paper.**

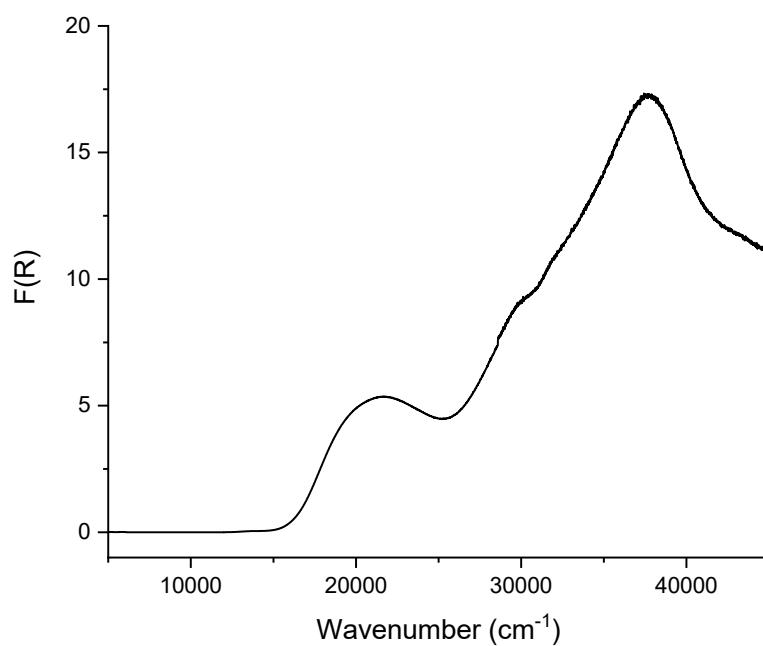

**Figure S3: Solid-state UV-Vis Spectrum of 1E**

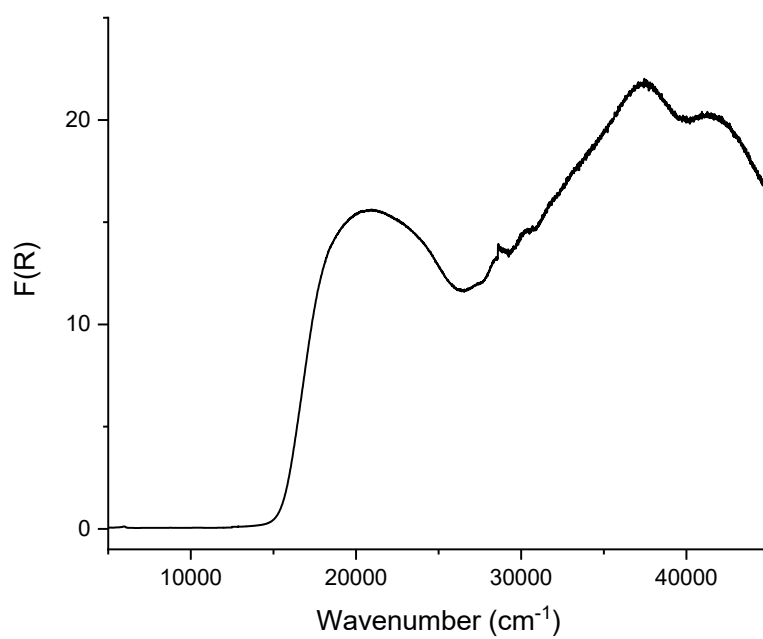

**Figure S4: Solid-state UV-Vis spectrum of 2**

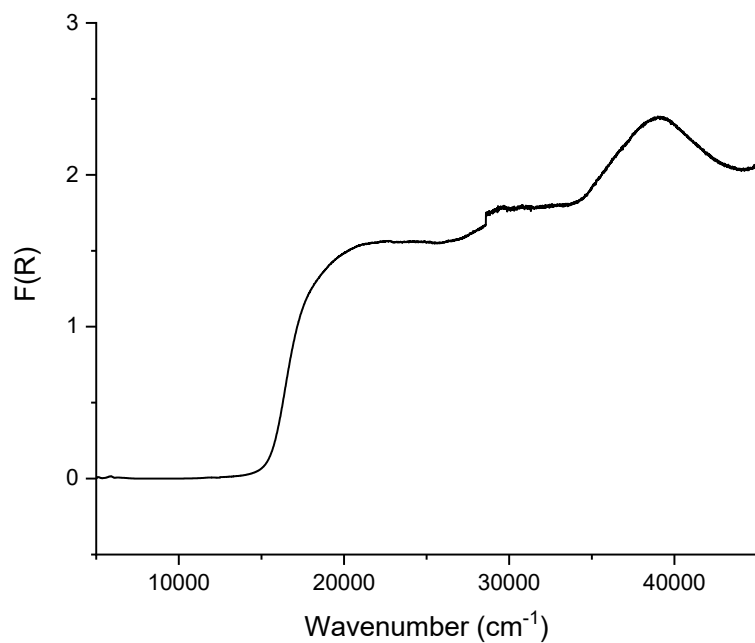

**Figure S5: Solid-state neutral UV-Vis spectrum of 3**

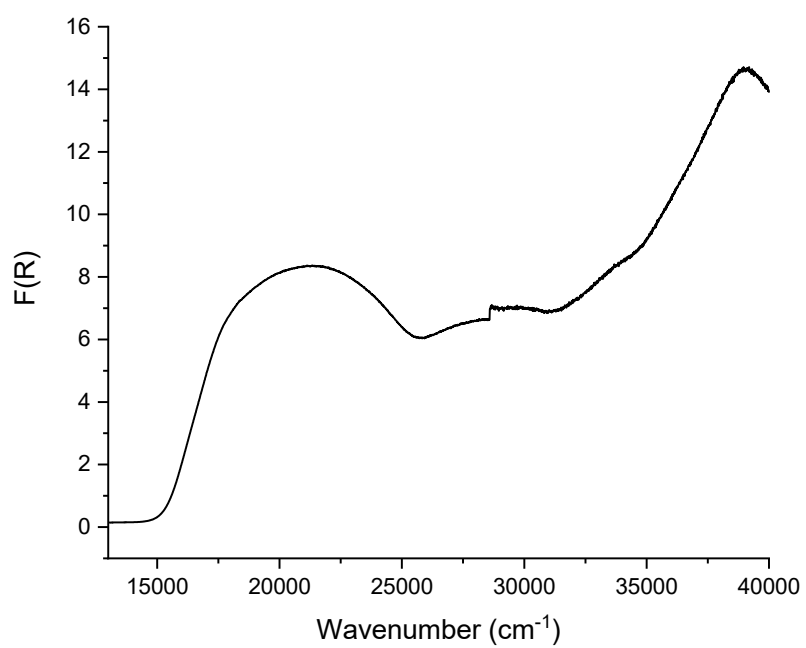

**Figure S6: Solid-State UV-Vis Spectrum of 3E**

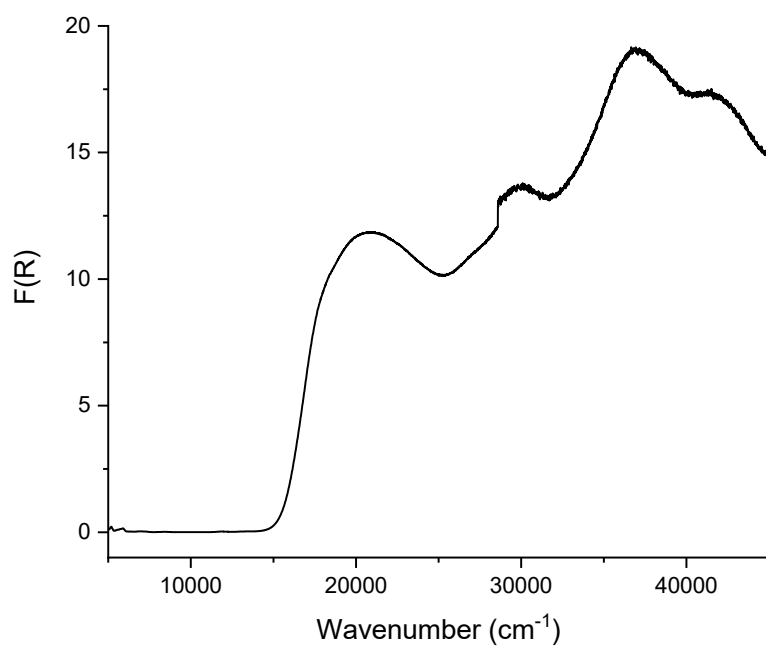

**Figure S7: Solid-state neutral UV-Vis spectrum of 4**

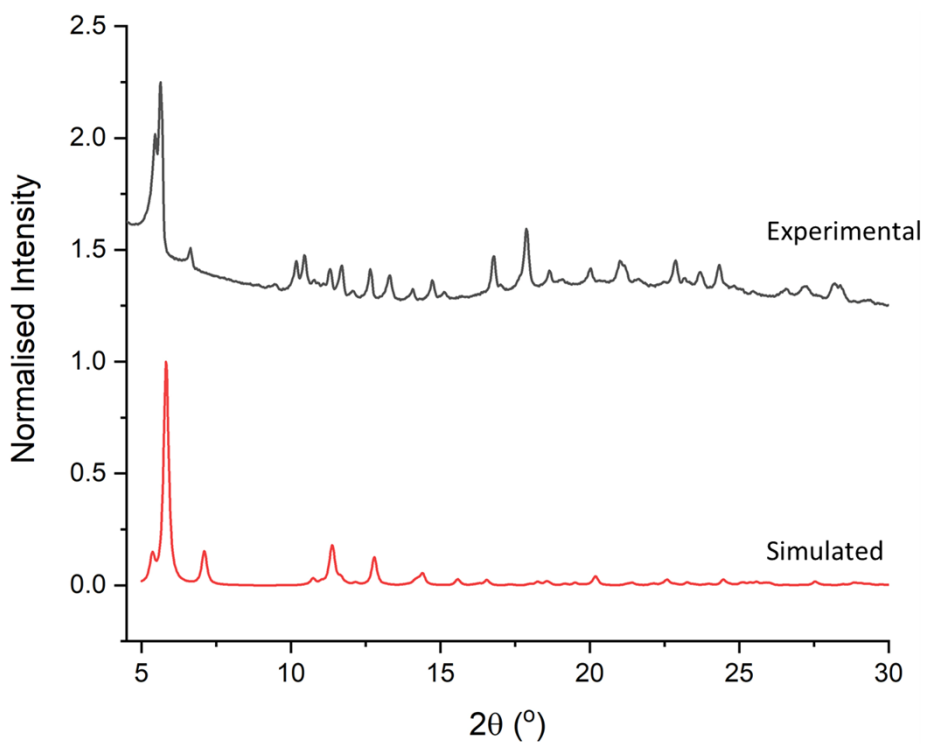

**Figure S8: PXRD pattern of 2 simulated (red) and experimental (black)**

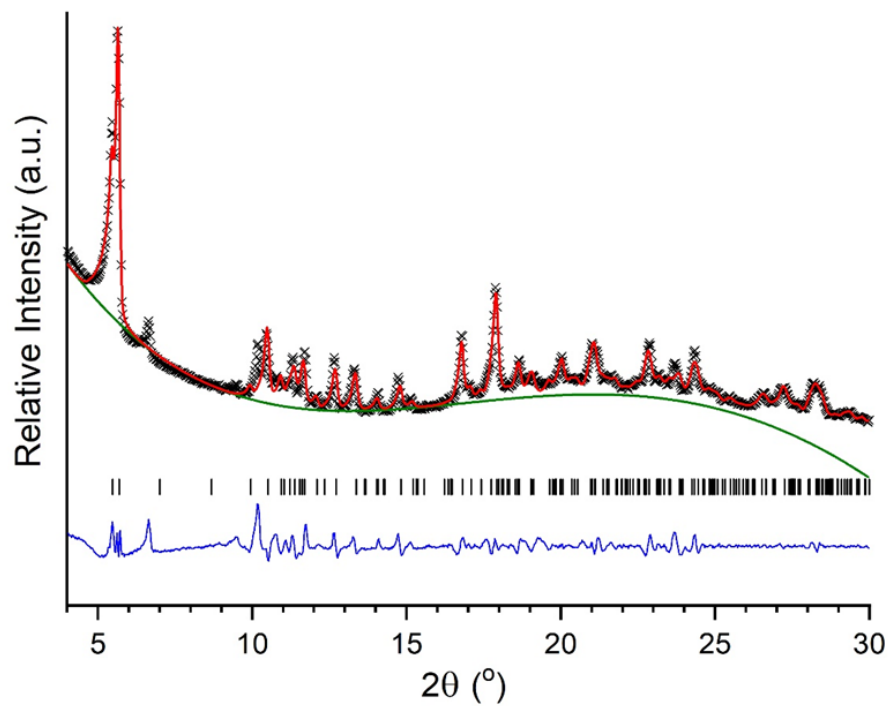

**Figure S9: Le Bail refinement of 2. Refinement converged at an Rwp of 4.512.**

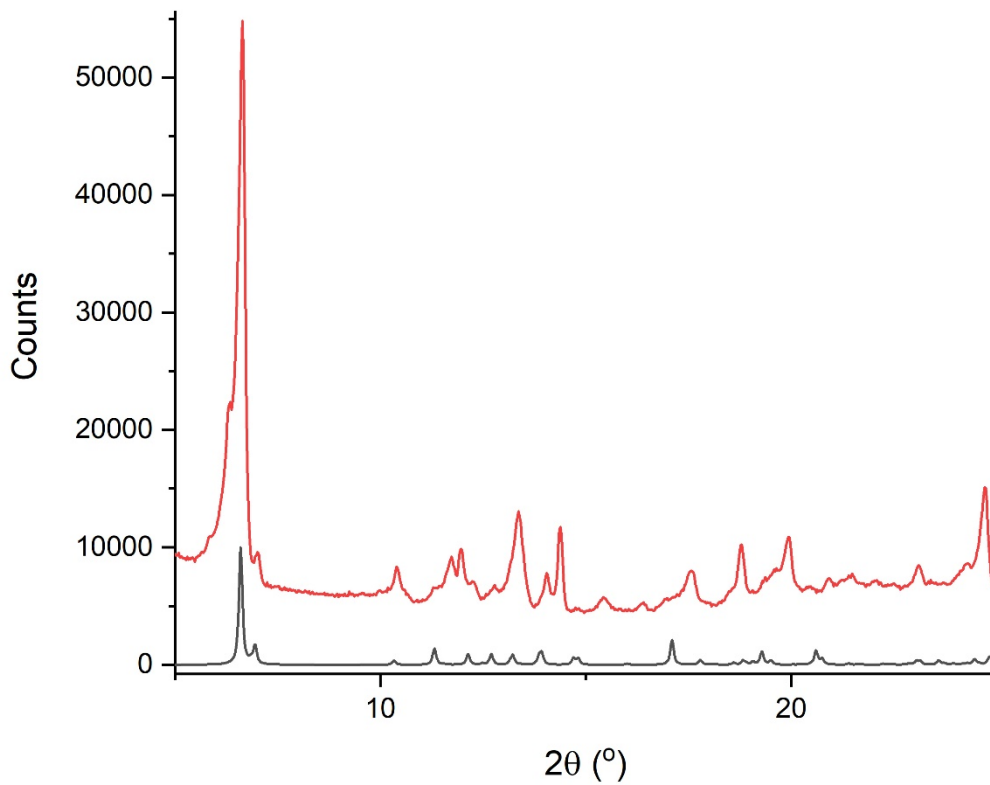

Figure S10: PXRD pattern of 3 simulated (black) and experimental (red).

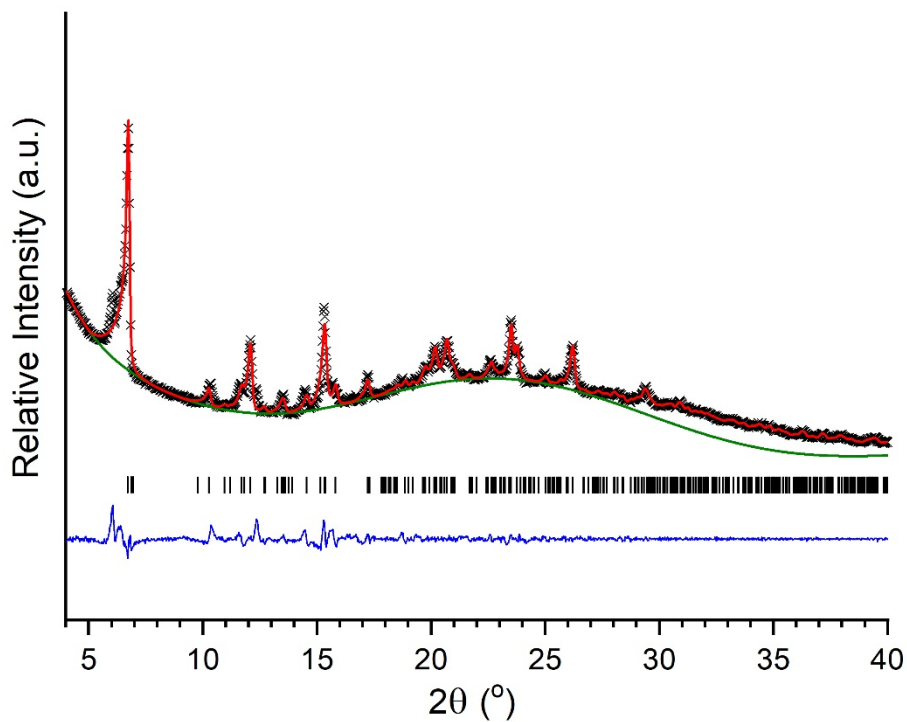

Figure S11: Le Bail refinement of 3. Refinement converged with an Rwp = 3.209

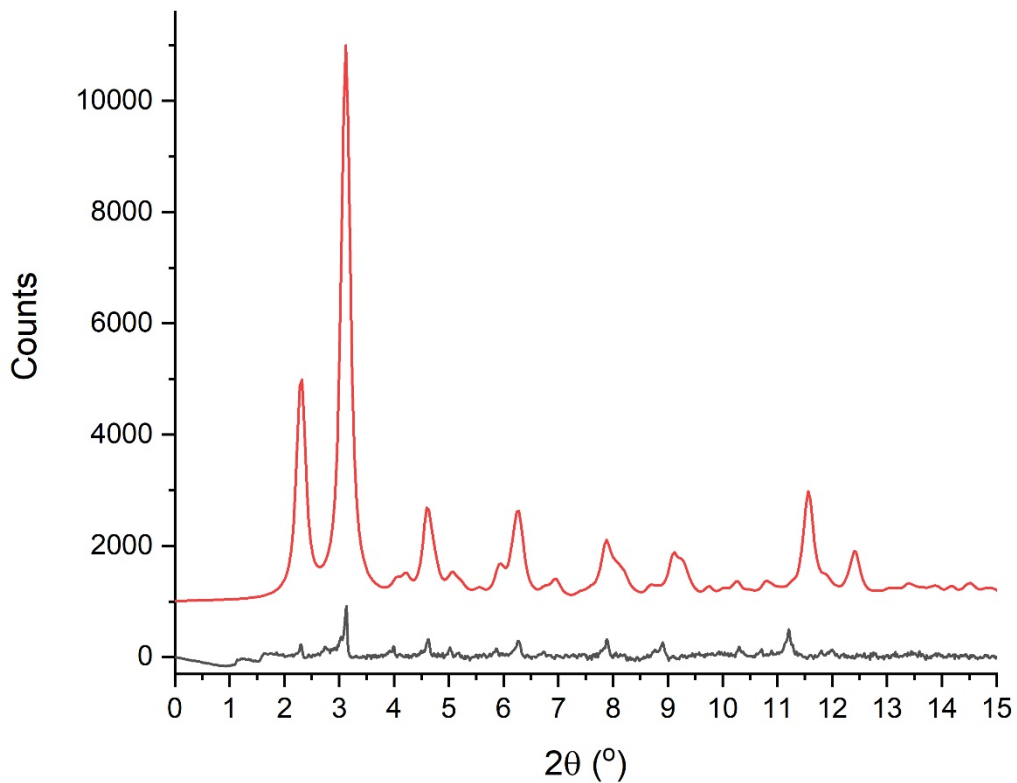

**Figure S12:PXRD pattern of 3E simulated (black) and experimental (red). Collected on a STOE capillary XRD fitted with a Mo source.**

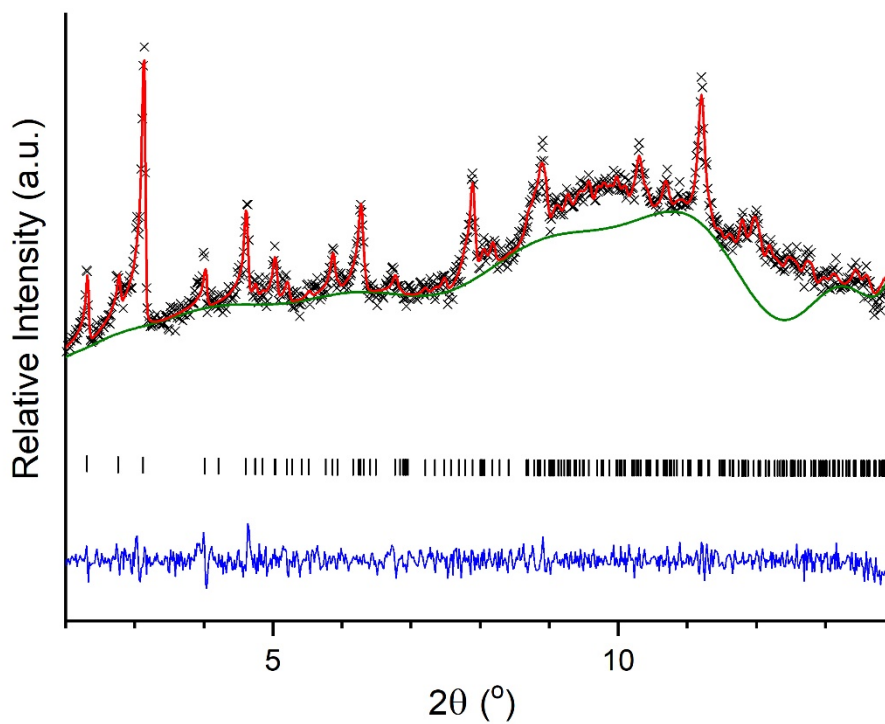

**Figure S13: Le Bail refinement of 3E. Refinement converged with an Rwp = 3.969**

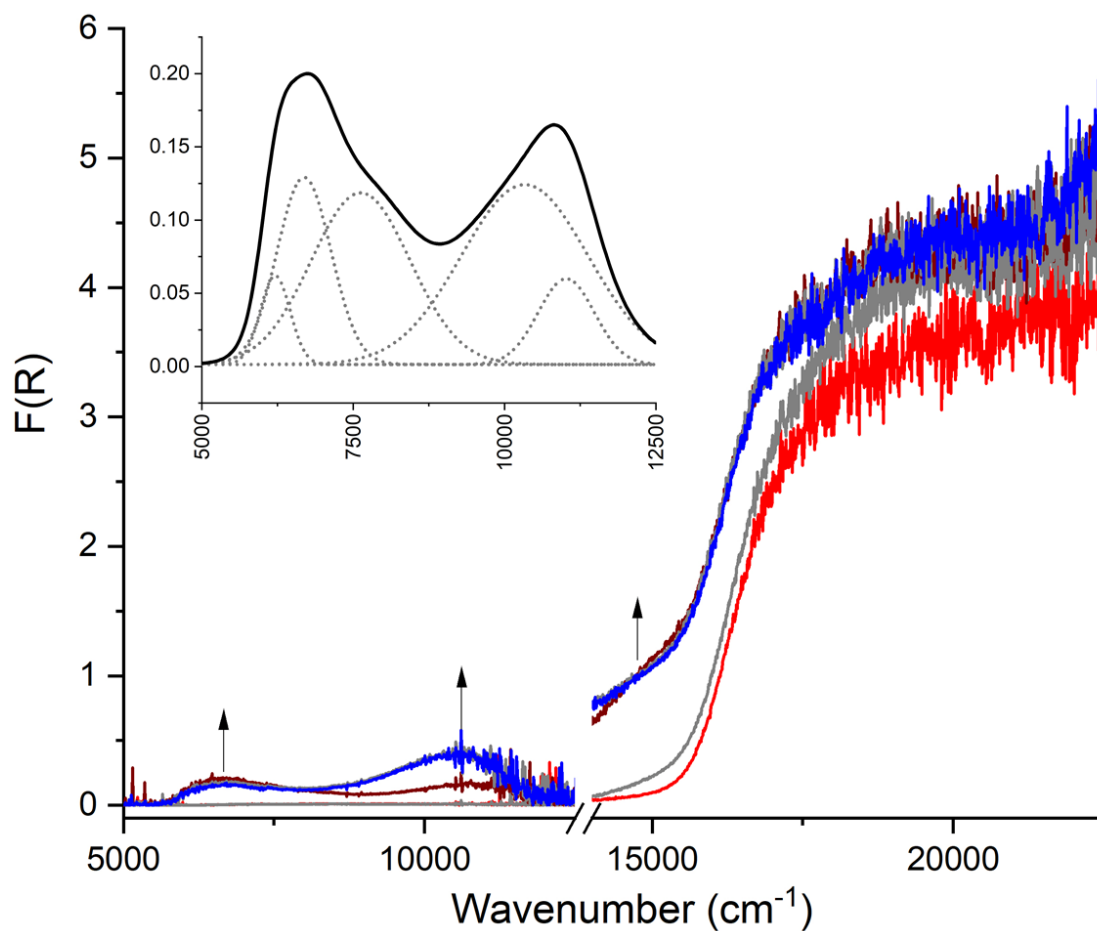

**Figure S14: Spectral progression of  $[\text{Cd}(\text{stil})_2(\text{Py}_2\text{TTF})_2]$  from 0-1.7 V. Detector change between 12500 and 14000  $\text{cm}^{-1}$  has been removed. 0.0 V spectrum is shown in red, 1.7 V spectrum is shown in blue, and 1.3 V spectrum where IVCT is maximised is shown in burgundy. Inset shows deconvolution of NIR region at 1.3 V.**



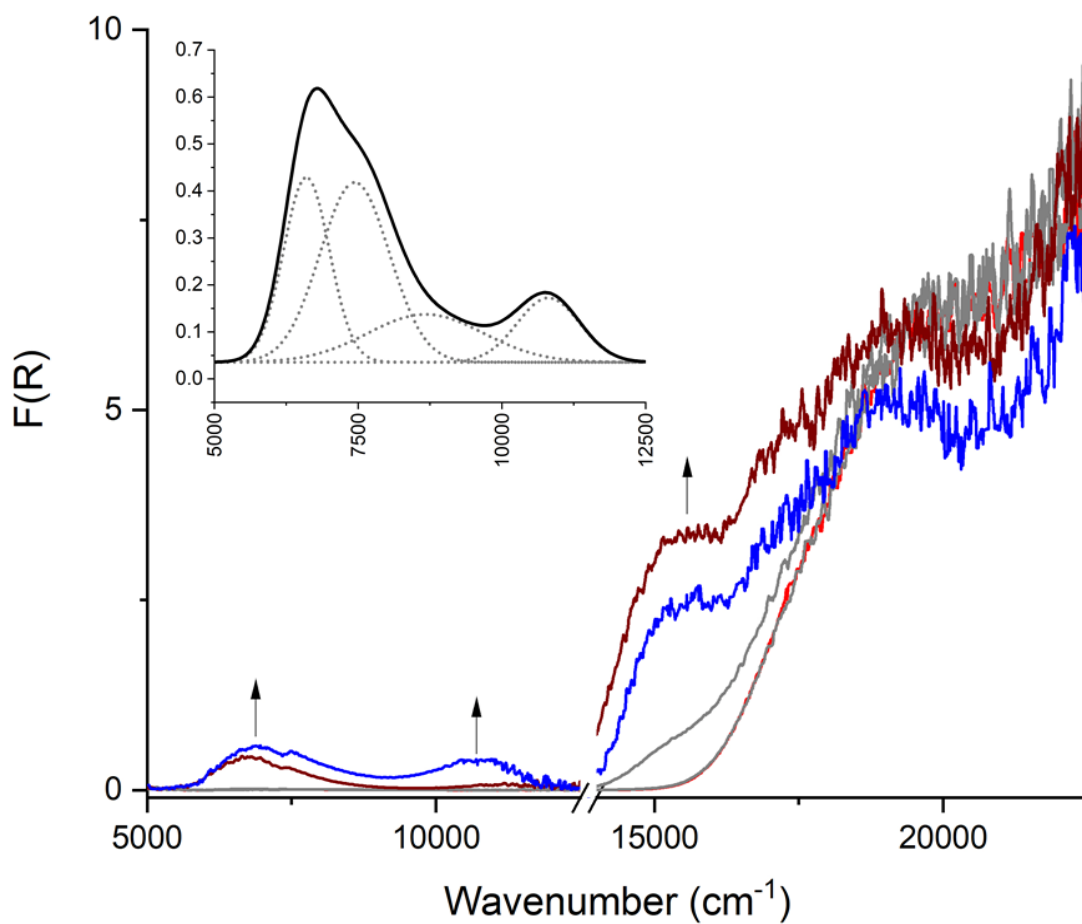

**Figure S15: Spectral progression of [Cd(schiff)<sub>2</sub>(Py<sub>2</sub>TTF)<sub>2</sub>] from 0-1.8 V. Detector change between 12500 and 14000 cm<sup>-1</sup> has been removed. 0.0 V spectrum is shown in red, 1.7 V spectrum is shown in blue, and 1.3 V spectrum where IVCT is maximised is shown in burgundy. Inset shows deconvolution of NIR region at 1.3 V.**

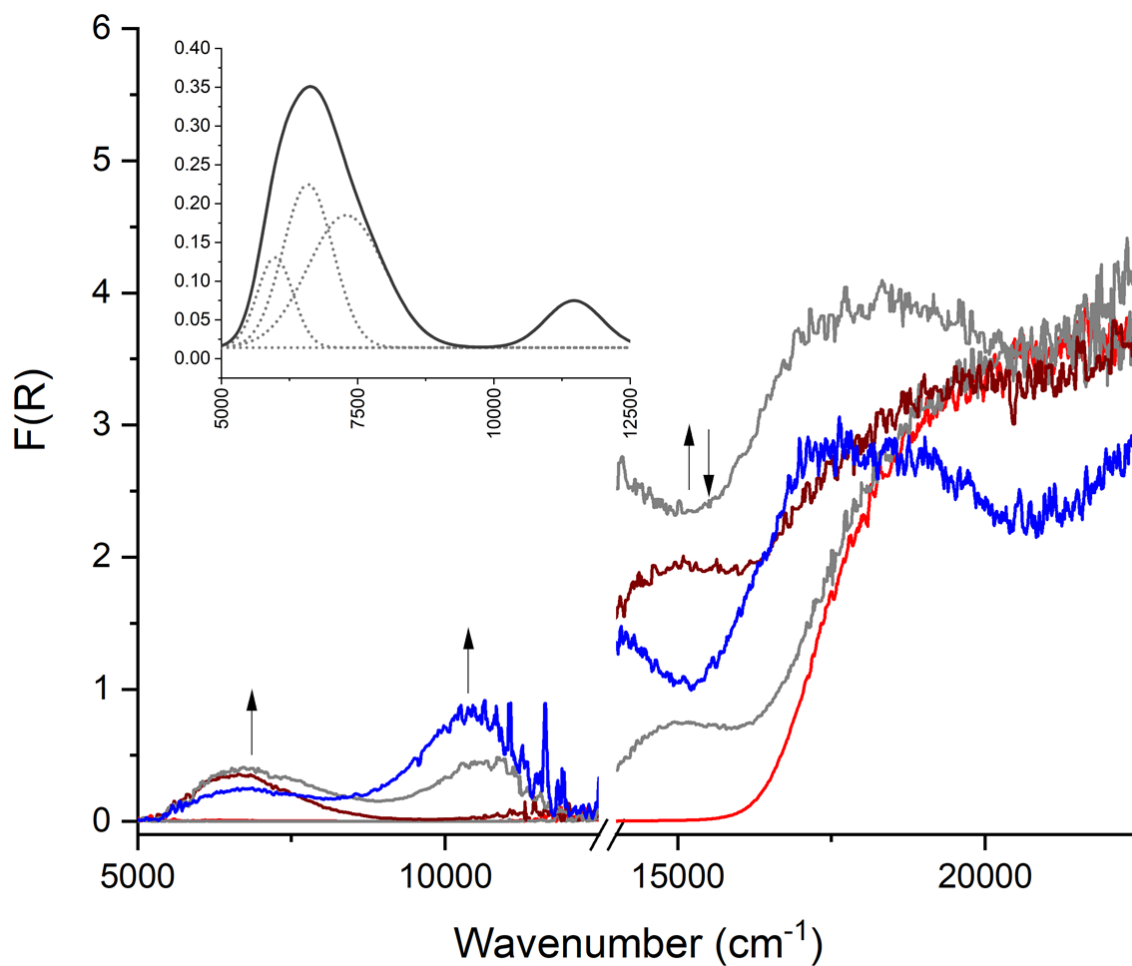

**Figure S16: Spectral progression of  $[\text{Cd}(\text{oba})_2(\text{Py}_2\text{TTF})_2]$  from 0.0 – 2.0 V. Detector change between 12500 and 14000  $\text{cm}^{-1}$  has been removed. 0.0 V spectrum is shown in red, 2.0 V spectrum is shown in blue, and 1.0 V spectrum where IVCT is maximised is shown in burgundy. Inset shows deconvolution of NIR region at 1.0 v.**

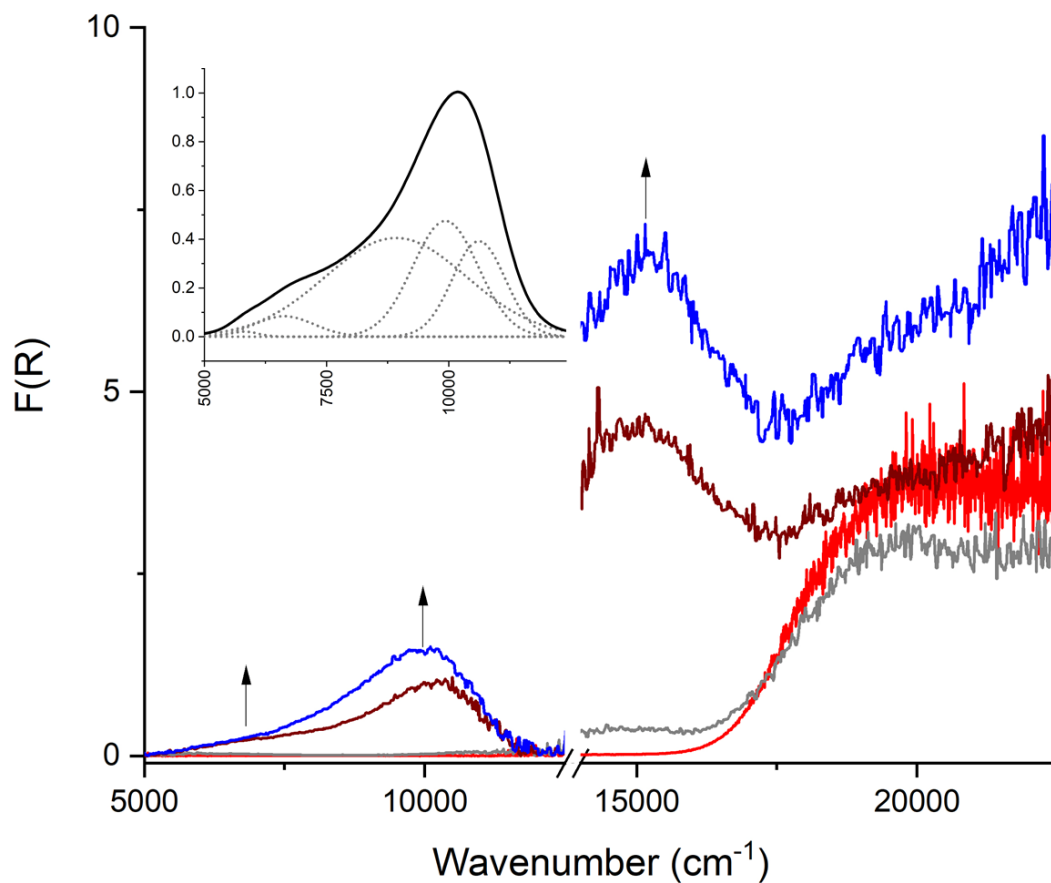

**Figure S17: Spectral progression of [Cd(oba)<sub>2</sub>(Py<sub>2</sub>Ph<sub>2</sub>TTF)<sub>2</sub>] from 0.0 – 2.0 V. Detector change between 12500 and 14000 cm<sup>-1</sup> has been removed. 0.0 V spectrum is shown in red, 2.0 V spectrum is shown in blue, and 1.3 V spectrum where IVCT is maximised is shown in burgundy. Inset shows deconvolution of NIR region at 1.3 V.**

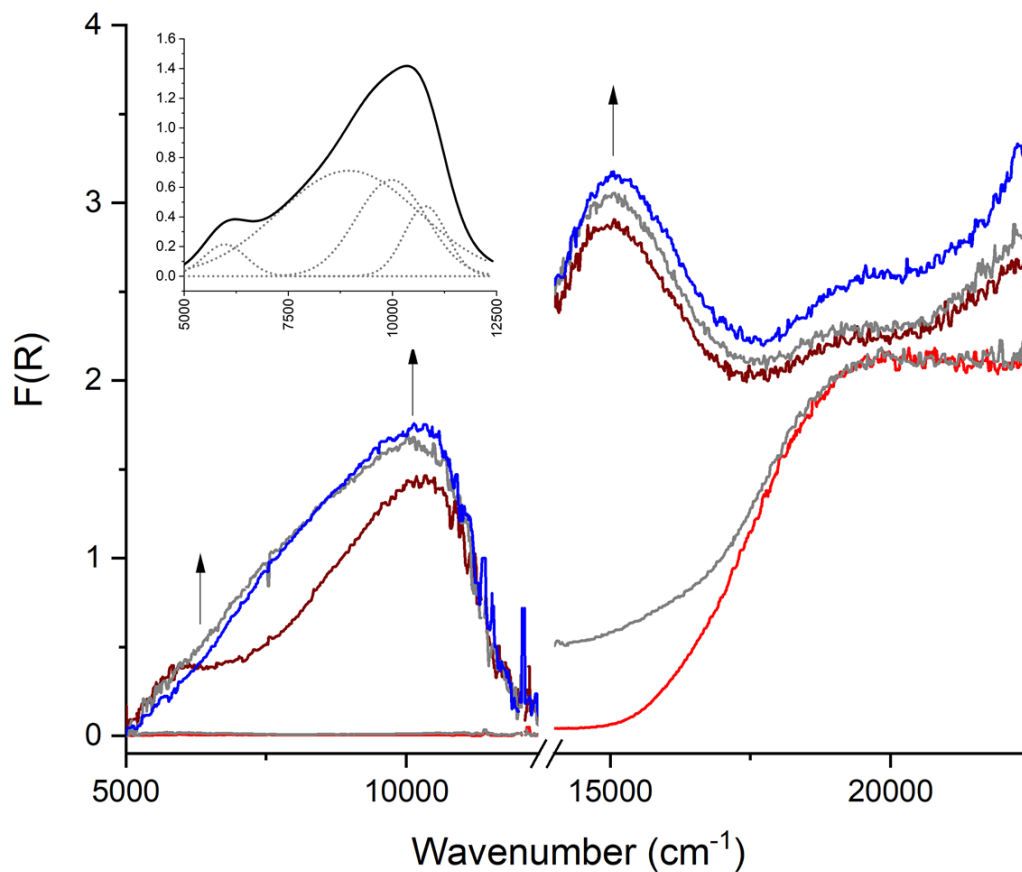

**Figure S18:** Spectral progression of [Cd(bpdc)2(Py2Ph2TTF)2] from 0.0 – 2.0 V. Detector change between 12500 and 14000 cm<sup>-1</sup> has been removed. 0.0 V spectrum is shown in red, 2.0 V spectrum is shown in blue, and 1.3 V spectrum where IVCT is maximised is shown in burgundy. Inset shows deconvolution of NIR region at 1.3 V.

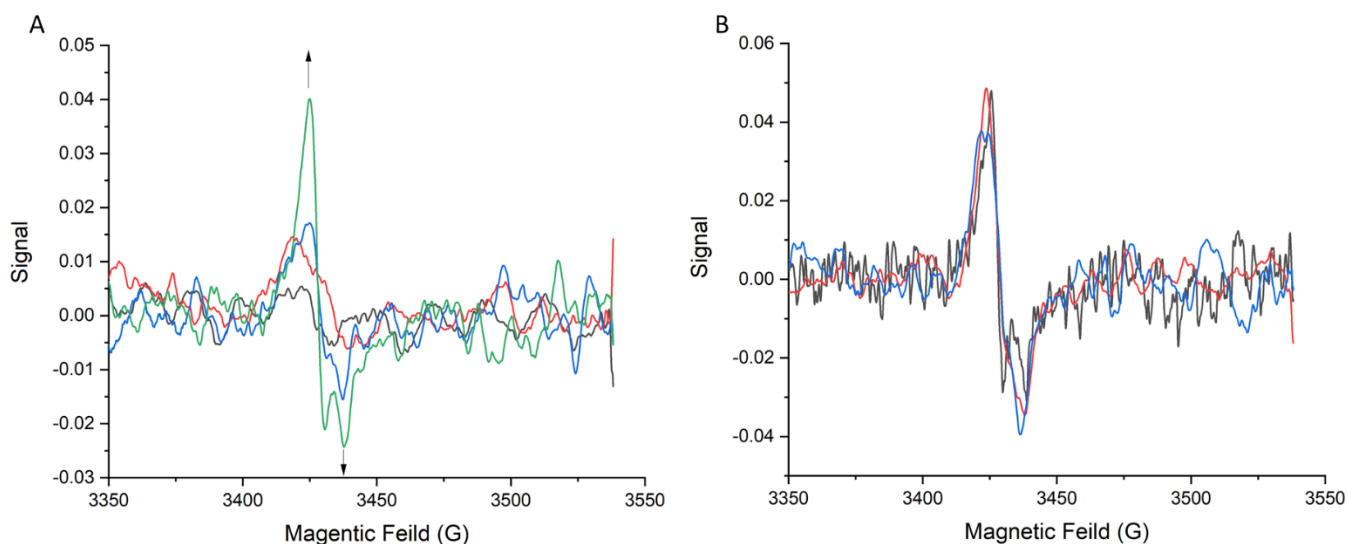

**Figure S19:** SEC-EPR spectrum of 1E. Displayed at 0.5 V intervals A) from 0.0 V – 2.0 V. B) from 2.0 V – 0.0 V.

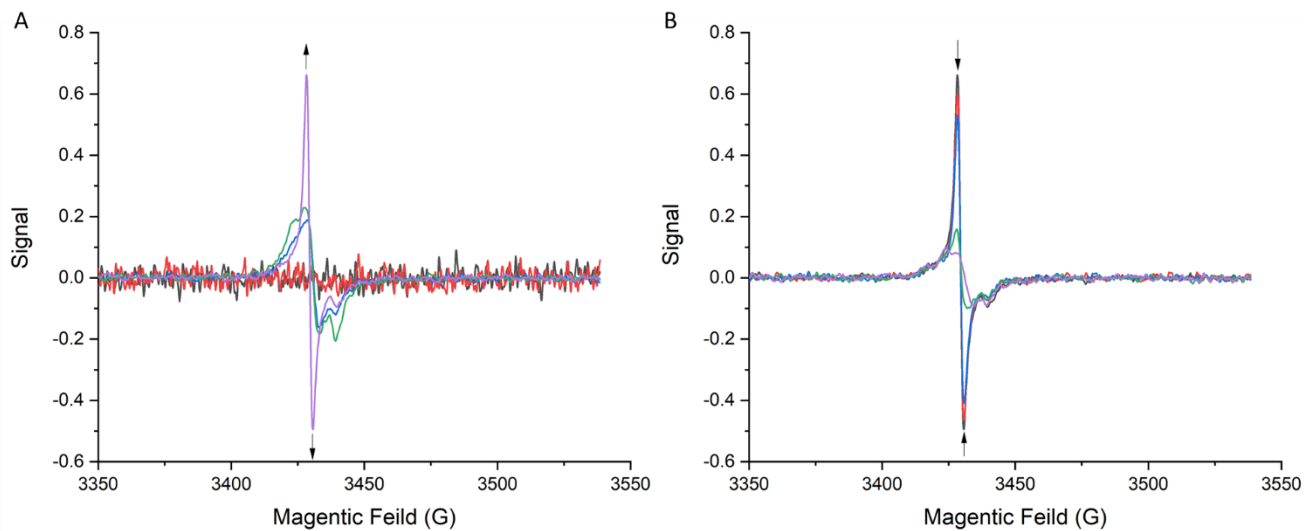

**Figure S20: SEC-EPR spectrum of 2. Displayed at 0.5 V intervals A) from 0.0 V – 2.0 V. B) from 2.0 V – 0.0 V.**

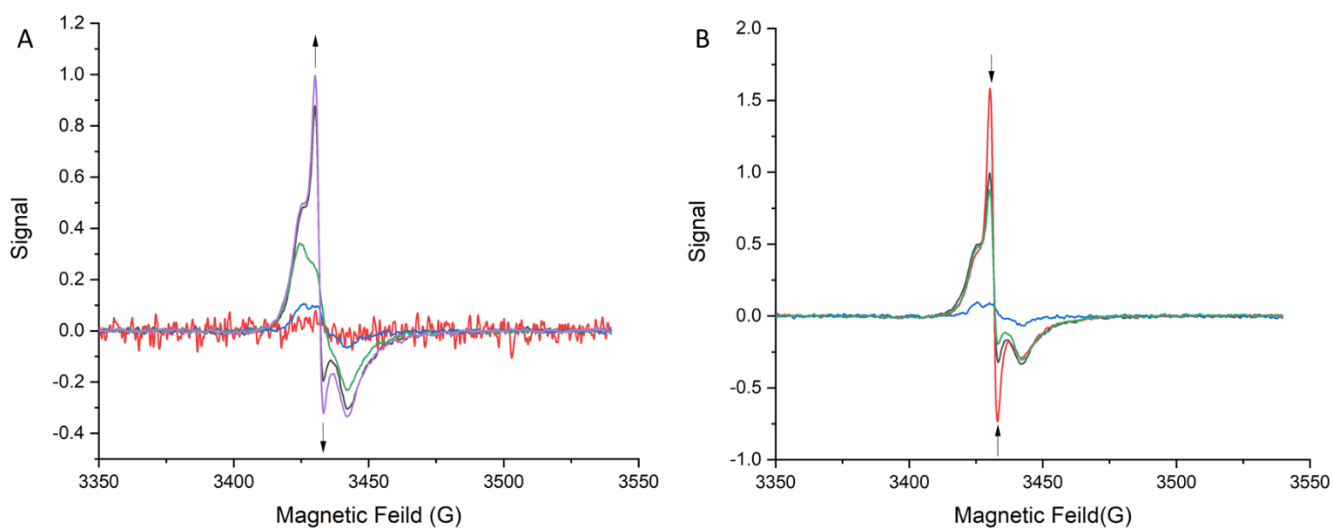

**Figure S21: SEC-EPR spectrum of 3. Displayed at 0.5 V intervals A) from 0.0 V - 2.0 V B) from 2.0 V - 0.0 V.**

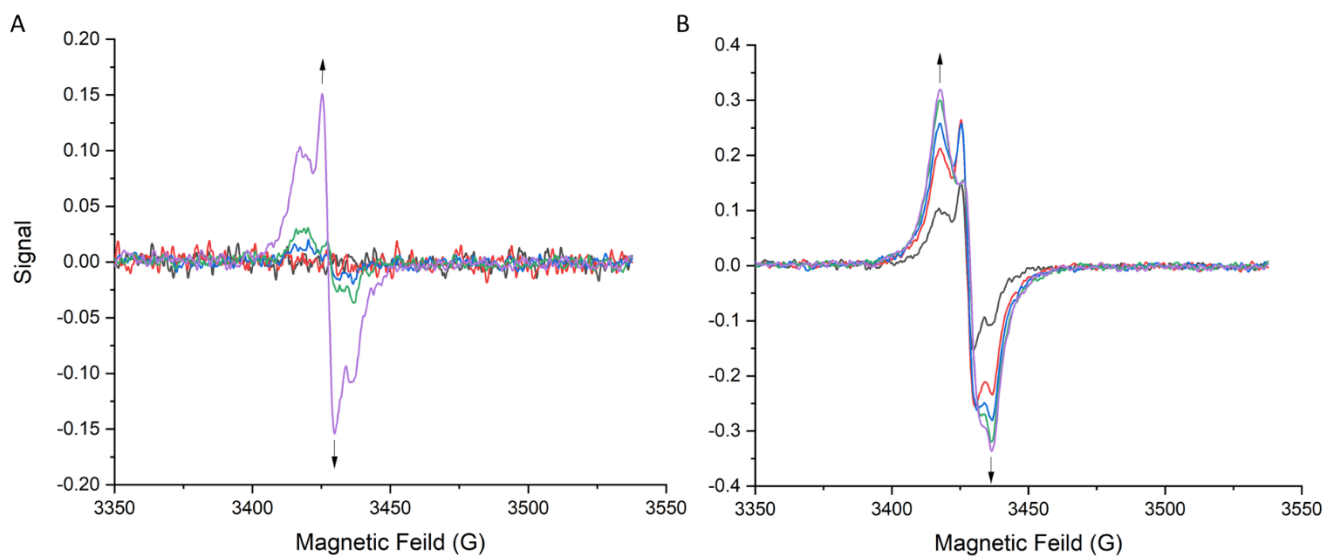

**Figure S22: SEC-EPR spectrum of 3E. Displayed at 0.5 V intervals A) from 0.0 V - 2.0 V B) from 2.0 V - 0.0 V.**

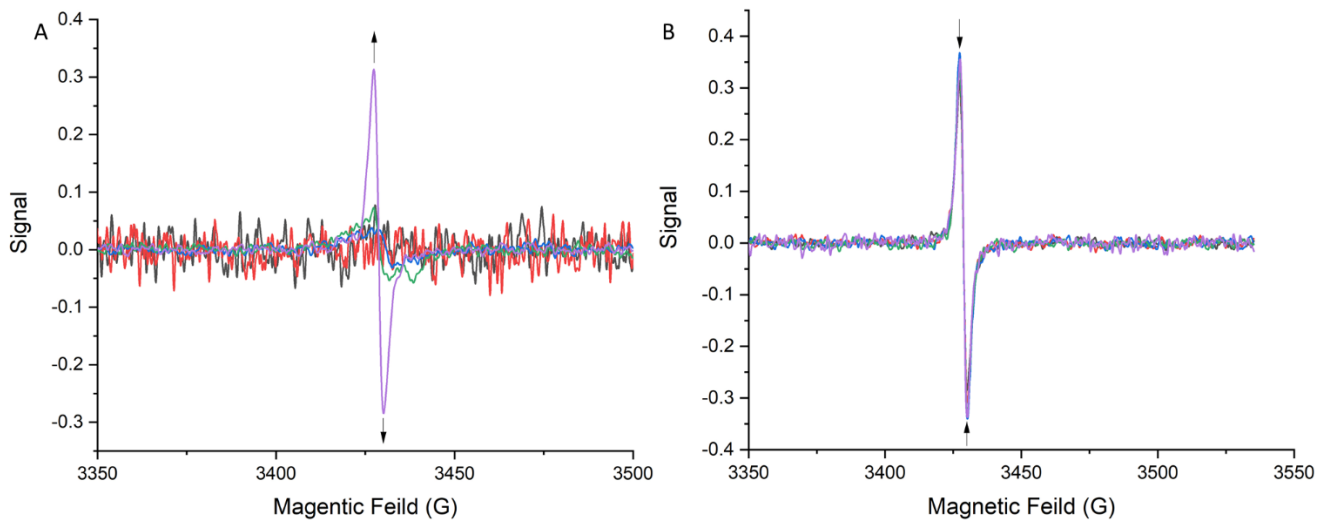

**Figure S23: SEC-EPR spectrum of 4. Displayed at intervals of 0.5 V A) from 0.0 V - 2.0 V. B) from 2.0 V - 0.0 V**

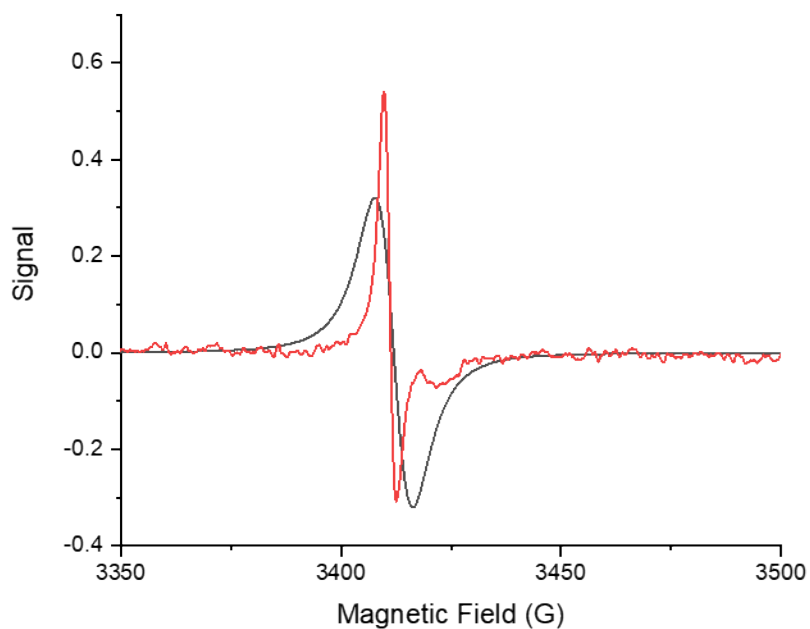

**Figure S24: Easyspin fitting of Framework 1. RMSD: 0.0894.  $g_x, g_y, g_z$ : 2.0136, 2.0136, 2.00136. Raw data is shown in red, easyspin simulation is shown in black.**

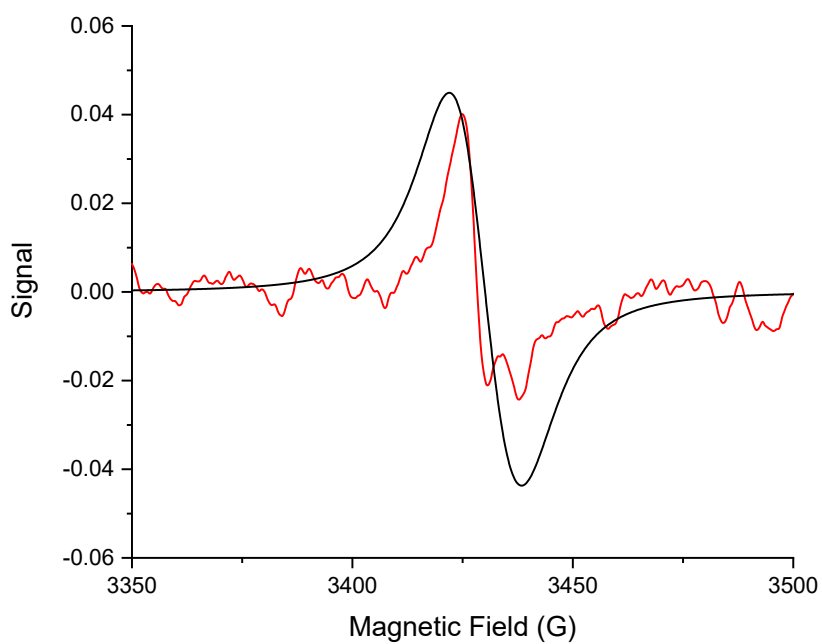

**Figure S25: Easyspin fitting of Framework 1E. RMSD: 8.7830.  $g_x, g_y, g_z$ : 2.0098, 2.0125, 2.0125. Raw data is shown in red, easyspin simulation is shown in red.**

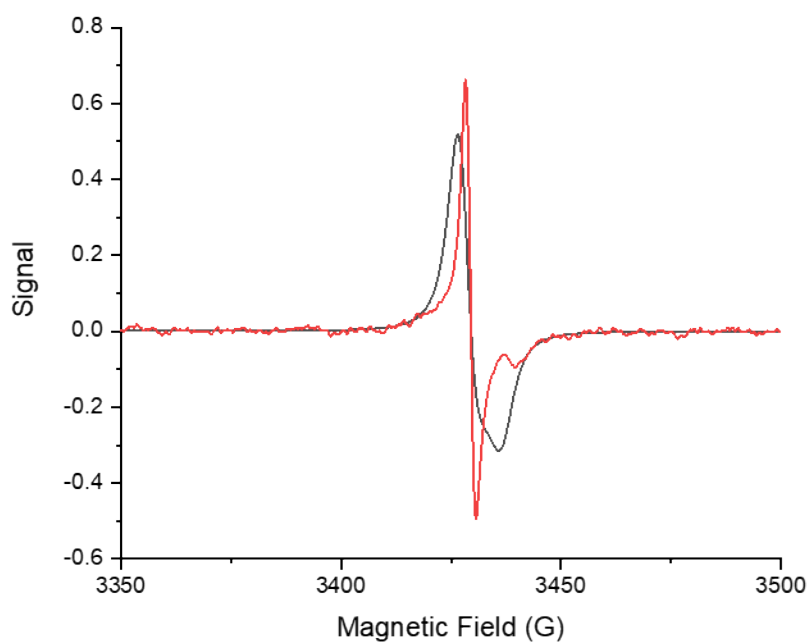

**Figure S26: Easyspin fitting of Framework 2. RMSD: 1.3535.  $g_x, g_y, g_z$ : 2.0154, 2.0206, 2.0206. Raw data is shown in red, easyspin simulation is shown in black.**

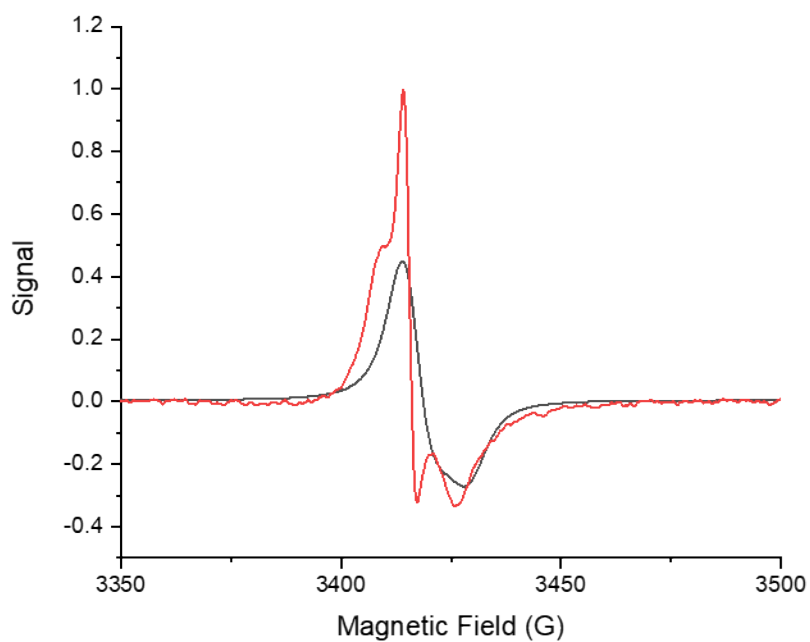

**Figure S27: Easyspin fitting of Framework 3. RMSD: 2.8385.  $g_x, g_y, g_z$ : 2.0210, 2.0210, 2.0131. Raw data is shown in red, easyspin simulation is shown in black.**

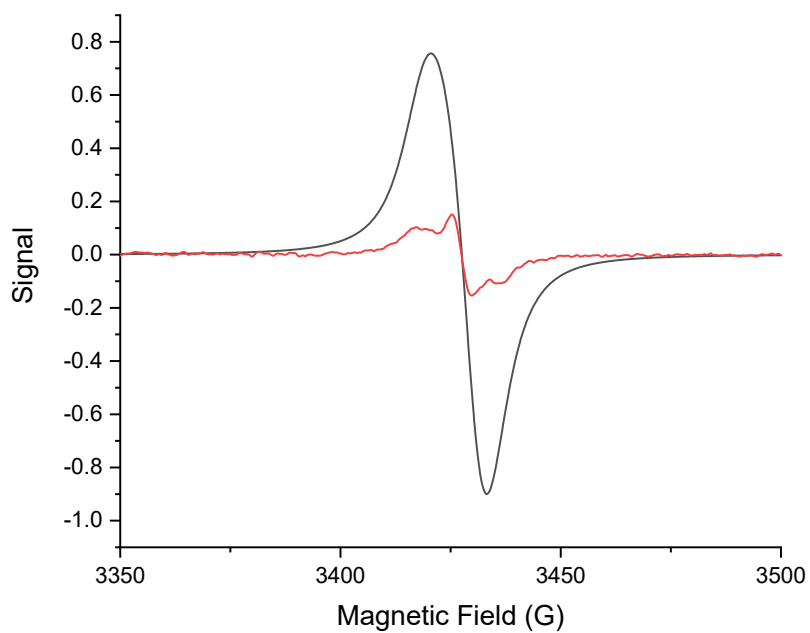

**Figure S28: Easyspin fitting of Framework 3E. RMSD: 3.1209.  $g_x, g_y, g_z$ : 2.0211, 2.0247, 2.0218. Raw data is shown in red, easyspin simulation is shown in black.**



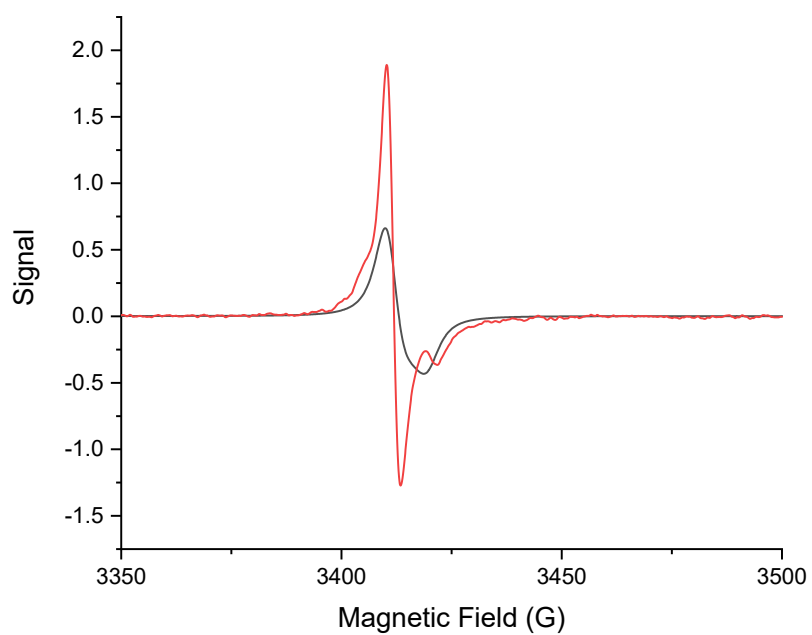

**Figure S29: Easypin fitting of Framework 4. RMSD: 1.6309.  $g_x, g_y, g_z$ : 2.0250, 2.0250, 2.0201. Raw data is shown in red, easypin simulation is shown in black.**

## Images for crystal measurements

Crystal width was determined by taking an image of the crystal used in the single crystal UV-Vis adsorption experiment propped on its side. Three measurements were taken across the width of the crystal using the Fiji image software. The ratio of pixels across the crystal to pixels in the scale bar was used to determine the width of the crystal.

### Information for Marcus-Hush analysis of 1

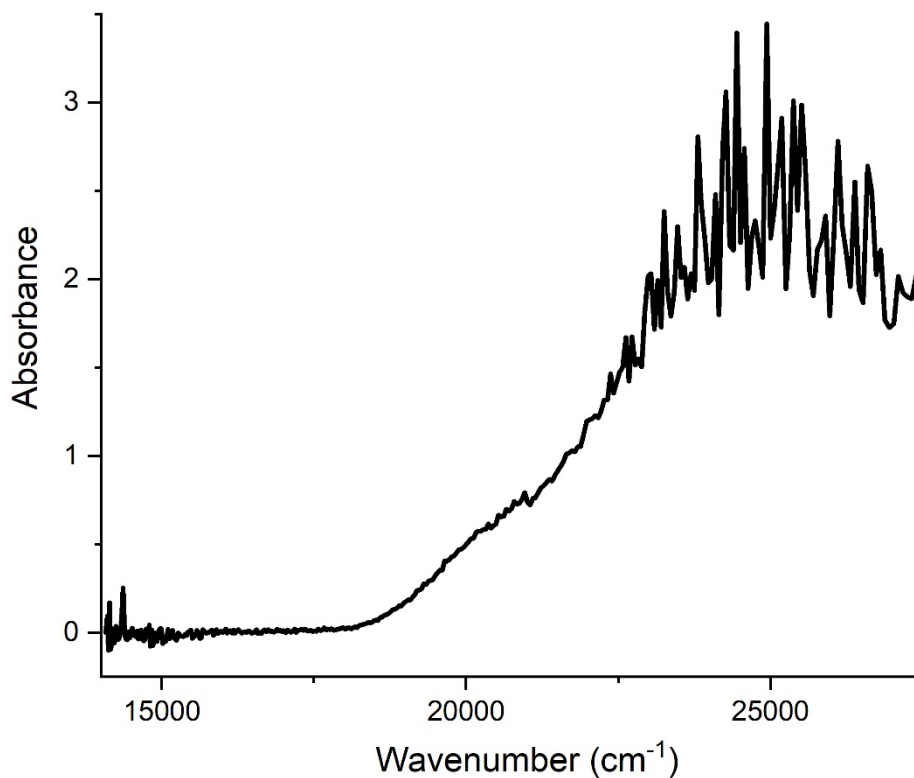

Figure S30: SC-UV-Vis spectrum of 1 from horizontally polarised light

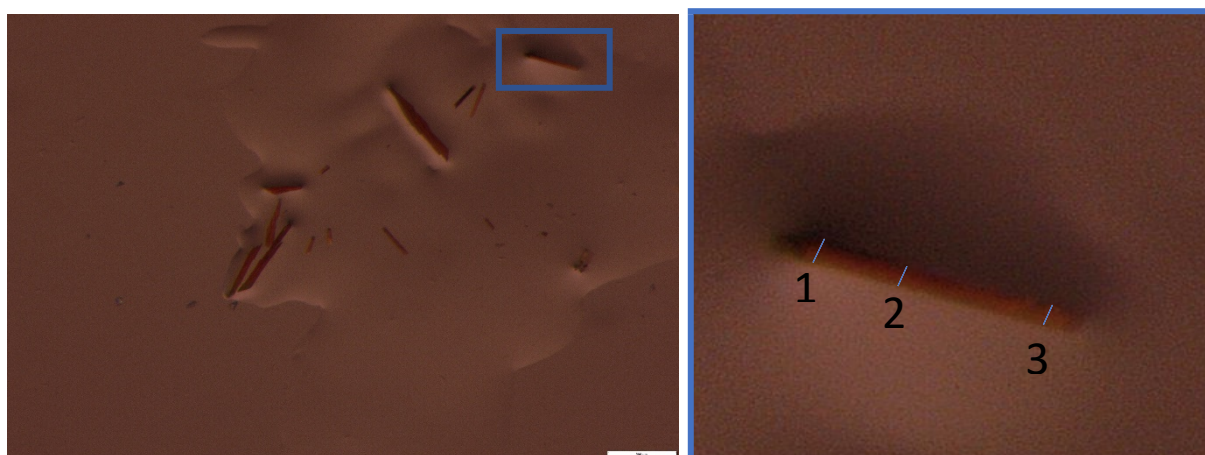

Figure S31: Crystal images of 1 used to measure the width of the crystal

Calculation of Crystal width

1: 18.514 pixels 2: 14.886 pixels 3: 17.088 pixels Av width = 16.829 pixels

200  $\mu\text{m}$  Scale bar: 255 pixels therefore 0.784  $\mu\text{m}/\text{pixel}$

Width of crystal = 0.784 x 16.829 = 13.199  $\mu\text{m}$  = 0.013199 mm = 0.0013199 cm

**Table S7: Spectral data for 1**

| $\nu_{max}$ (cm <sup>-1</sup> )* | F(R) <sub>max</sub> (a.u.) | $\Delta\nu_{1/2}$ (cm <sup>-1</sup> ) | $\Delta\nu_{1/2}^0$ (cm <sup>-1</sup> ) | $\epsilon$ (M <sup>-1</sup> cm <sup>-1</sup> ) | H <sub>ab</sub> (cm <sup>-1</sup> ) |
|----------------------------------|----------------------------|---------------------------------------|-----------------------------------------|------------------------------------------------|-------------------------------------|
| 6479(178)                        | 0.33(9)                    | 1221(165)                             | 3935                                    | 91(34)                                         | 145(40)                             |
| 7775                             | 0.171                      | 1113                                  | 4238                                    |                                                |                                     |
| 9981                             | 0.190                      | 5009                                  | 4802                                    |                                                |                                     |
| 10669                            | 0.300                      | 1111                                  | 4964                                    |                                                |                                     |
| 14991                            | 0.557                      | 1533                                  | 5885                                    |                                                |                                     |
| 17471                            | 1.496                      | 3153                                  | 6353                                    |                                                |                                     |
| 19524                            | 0.823                      | 1922                                  | 6716                                    |                                                |                                     |
| 23262                            | 2.614                      | 6127                                  | 7330                                    |                                                |                                     |

### Information for Marcus-Hush Analysis of 2

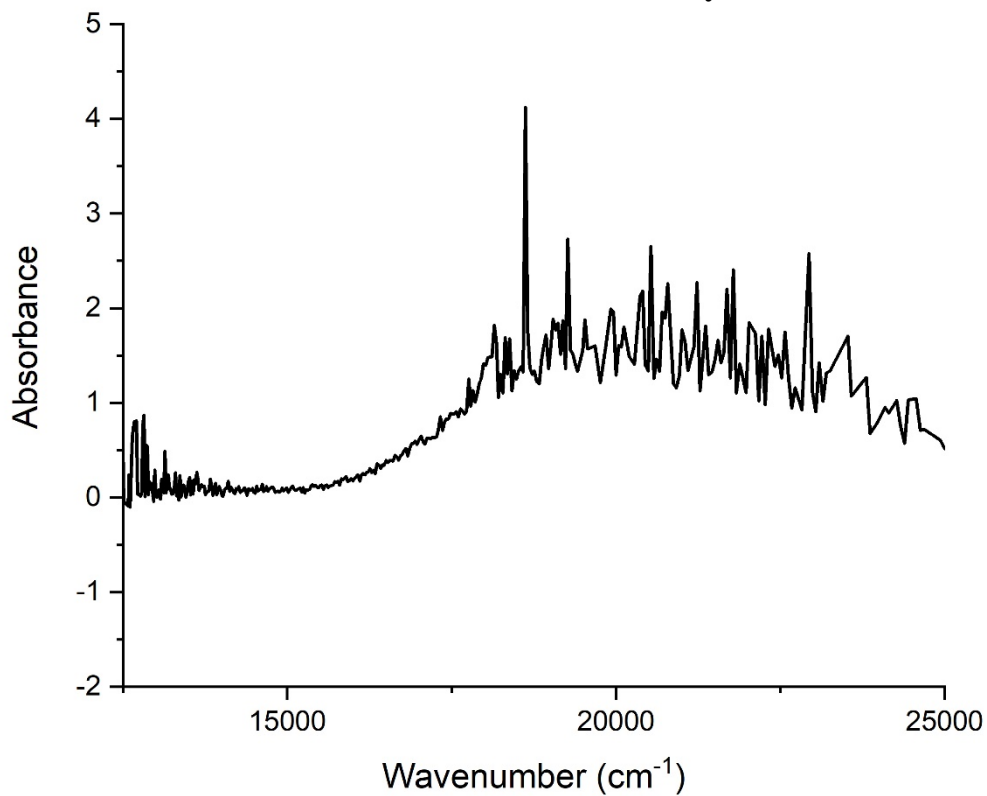

Figure S32: SC-UV-Vis spectrum of 2 from horizontally polarised light

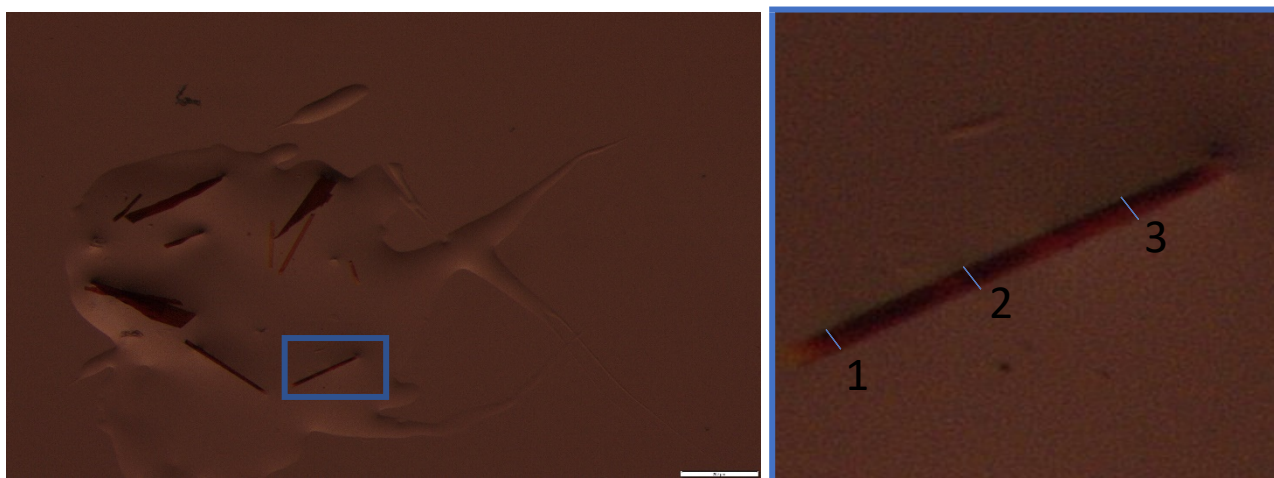

Figure S33: Crystal images of 2 used to measure the width of the crystal

1: 15.443 pixels 2: 13.463 pixels 3: 14.151 pixels Av. Width = 14.352 pixels

200  $\mu\text{m}$  scale bar: 255.666 therefore 0.782 pixels/ $\mu\text{m}$

Crystal width  $\mu\text{m}$  = 14.352 x 0.782 = 11.224  $\mu\text{m}$  = 0.011224 mm = 0.0011224 cm

**Table S8: Spectral data for 2**

| $\nu_{max}$ (cm <sup>-1</sup> )* | F(R) <sub>max</sub> (a.u.) | $\Delta\nu_{1/2}$ (cm <sup>-1</sup> ) | $\Delta\nu_{1/2}^0$ (cm <sup>-1</sup> ) | $\epsilon$ (M <sup>-1</sup> cm <sup>-1</sup> ) | H <sub>ab</sub> (cm <sup>-1</sup> ) |
|----------------------------------|----------------------------|---------------------------------------|-----------------------------------------|------------------------------------------------|-------------------------------------|
| 6213(20)                         | 0.067(6)                   | 543(51)                               | 1051                                    | 19(4)                                          | 44(7)                               |
| 6632                             | 0.10                       | 697                                   | 1269                                    |                                                |                                     |
| 7127                             | 0.07                       | 1146                                  | 1627                                    |                                                |                                     |
| 8016                             | 0.12                       | 4236                                  | 3128                                    |                                                |                                     |
| 10828                            | 0.15                       | 1782                                  | 2028                                    |                                                |                                     |
| 14881                            | 0.49                       | 1569                                  | 1903                                    |                                                |                                     |
| 16637                            | 1.24                       | 1714                                  | 1990                                    |                                                |                                     |
| 17868                            | 1.79                       | 2525                                  | 2415                                    |                                                |                                     |
| 19662                            | 1.59                       | 3023                                  | 2643                                    |                                                |                                     |
| 24802                            | 5.34                       | 8584                                  | 4453                                    |                                                |                                     |

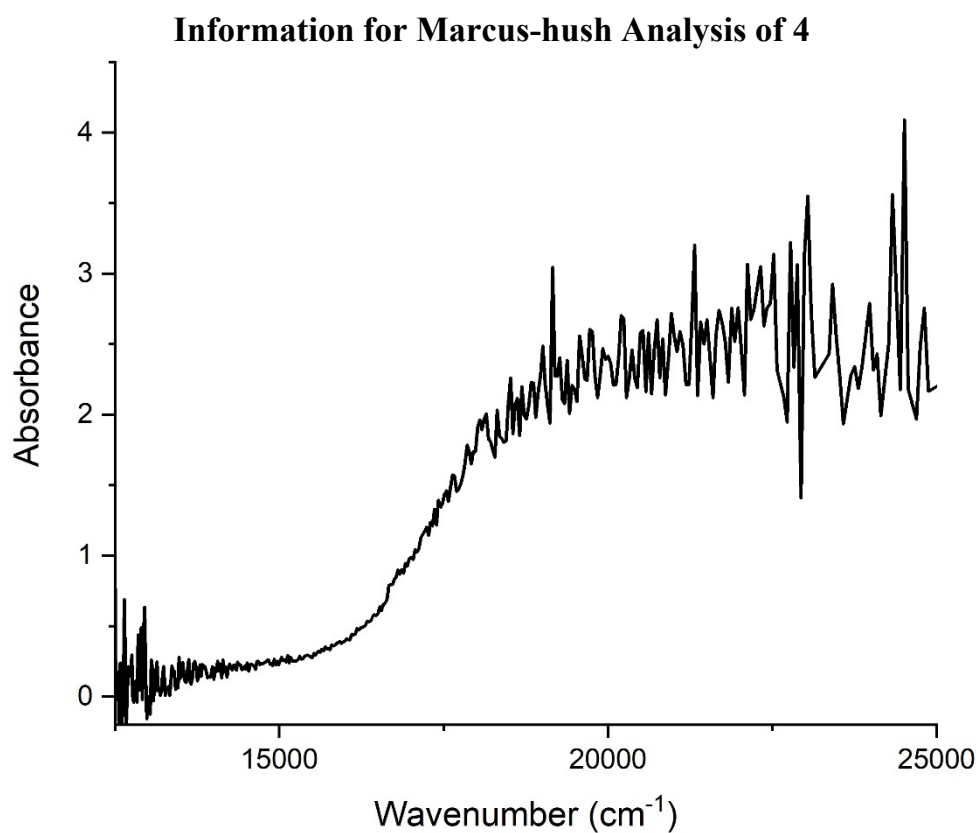**Figure S34: SC-UV-Vis spectrum of 4 from horizontally polarised light**

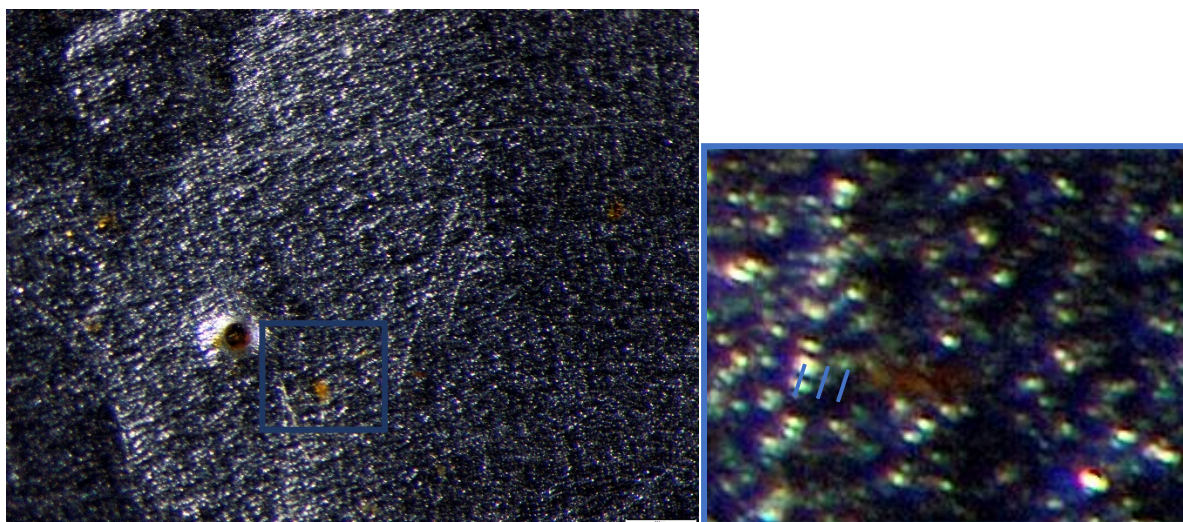

**Figure S35: Crystal images of 4 used to measure the width of the crystal.**

1: 16.125 pixels 2: 14.000 pixels 3 : 15.133 pixels  $\Delta v$  width = 15.086 pixels

200  $\mu\text{m}$  scale bar length = 256 pixels. 0.781 pixels/ $\mu\text{m}$

Crystal width = 0.781 x 15.086  $\mu\text{m}$  = 11.786  $\mu\text{m}$  = 0.011786 mm = 0.0011786 cm

**Table S9: Spectral data for 4**

| $\nu_{max}$ ( $\text{cm}^{-1}$ )* | $F(R)_{max}$ (a.u.) | $\Delta\nu_{1/2}$ ( $\text{cm}^{-1}$ ) | $\Delta\nu_{1/2}^0$ ( $\text{cm}^{-1}$ ) | $\epsilon$ ( $\text{M}^{-1} \text{cm}^{-1}$ ) | $H_{ab}$ ( $\text{cm}^{-1}$ ) |
|-----------------------------------|---------------------|----------------------------------------|------------------------------------------|-----------------------------------------------|-------------------------------|
| 6616(19)                          | 0.37(6)             | 945(10)                                | 1472                                     | 67(11)                                        | 110(14)                       |
| 7441                              | 0.458               | 2023                                   | 2162                                     |                                               |                               |
| 10582                             | 0.165               | 2217                                   | 2263                                     |                                               |                               |
| 15207                             | 2.38                | 1836                                   | 2059                                     |                                               |                               |
| 18302                             | 3.13                | 3746                                   | 2941                                     |                                               |                               |
| 23827                             | 8.34                | 7665                                   | 4207                                     |                                               |                               |

### Information for Marcus-Hush Analysis of 3

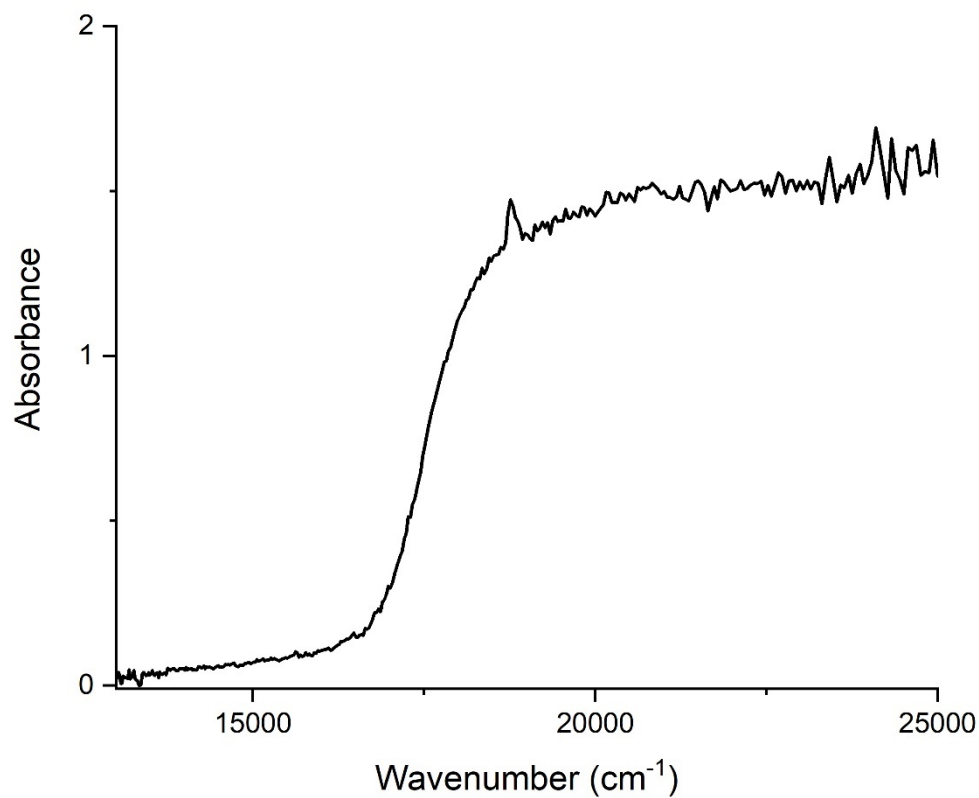

**Figure S36: SC-UV-Vis spectrum of 3 from horizontally polarised light**

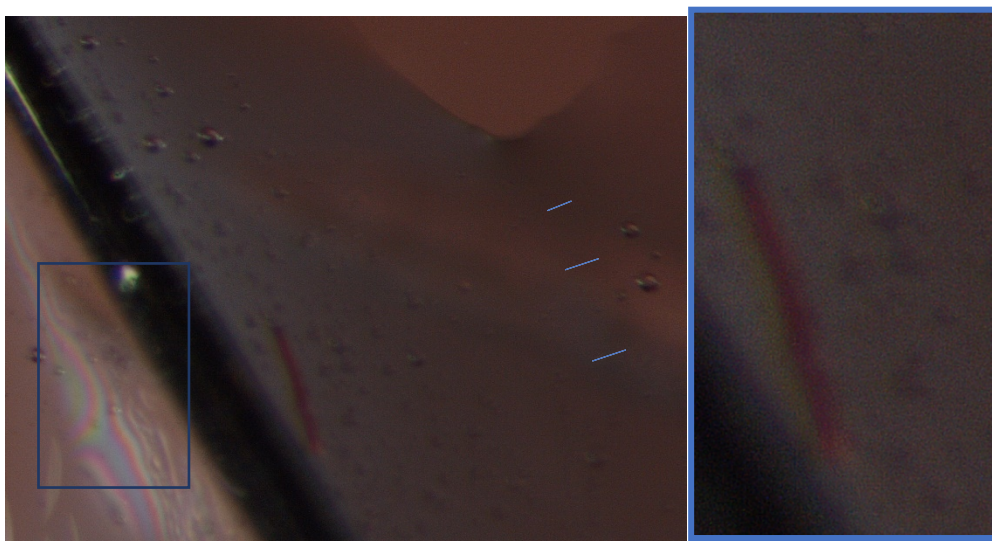

**Figure S37: Crystal images of 3 used to measure the width of the crystal.**

1: 20.881 pixels 2: 21.190 pixels 3 : 17.464 pixels Av width = 19.845 pixels

200  $\mu\text{m}$  scale bar length = 254 pixels. 0.787 pixels/ $\mu\text{m}$

Crystal width = 0.787 x 19.845  $\mu\text{m}$  = 15.626  $\mu\text{m}$  = 0.015626 mm = 0.0015626 cm

**Table S10: Spectral data for 3**

| $\nu_{max}$ (cm <sup>-1</sup> )* | F(R) <sub>max</sub> (a.u.) | $\Delta\nu_{1/2}$ (cm <sup>-1</sup> ) | $\Delta\nu_{1/2}^0$ (cm <sup>-1</sup> ) | $\epsilon$ (M <sup>-1</sup> cm <sup>-1</sup> ) | H <sub>ab</sub> (cm <sup>-1</sup> ) |
|----------------------------------|----------------------------|---------------------------------------|-----------------------------------------|------------------------------------------------|-------------------------------------|
| 6051(97)                         | 0.12(1)                    | 862(137)                              | 3778                                    | 37(4)                                          | 75(11)                              |
| 6670(127)                        | 0.215(7)                   | 1224(208)                             | 3973                                    |                                                |                                     |
| 7383(141)                        | 0.13(5)                    | 1885(298)                             | 4175                                    |                                                |                                     |
| 11051                            | 0.0442                     | 811                                   | 5052                                    |                                                |                                     |
| 14392                            | 1.2755                     | 2244                                  | 5765                                    |                                                |                                     |
| 18296                            | 2.49498                    | 5326                                  | 6501                                    |                                                |                                     |
| 24519                            | 4.01606                    | 7356                                  | 7525                                    |                                                |                                     |



### Information for Marcus-Hush Analysis of 3E

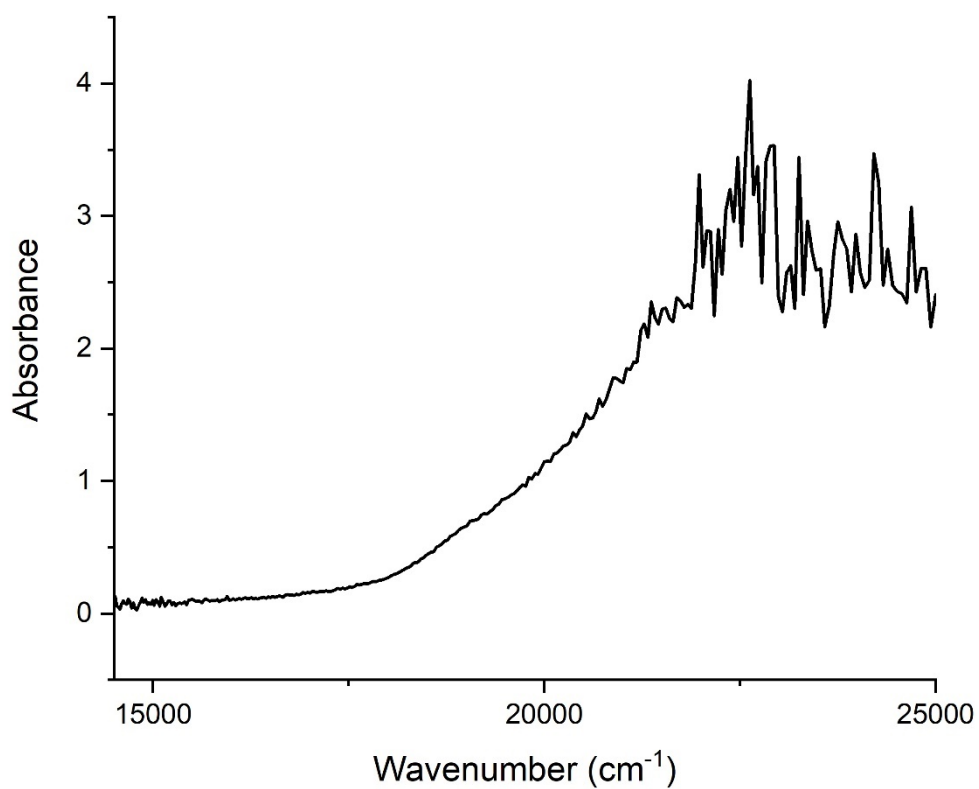

**Figure S38: SC-UV-Vis spectrum of 3E from horizontally polarised light**

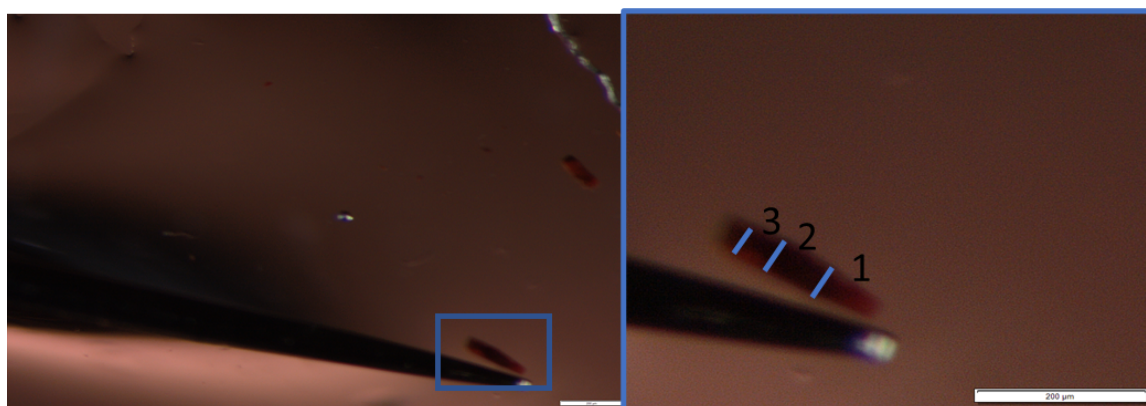

**Figure S39: Crystal images of 3E used to measure the width of the crystal.**

1: 30.30 pixels 2: 19.063 pixels 3: 20.436 pixels Av width = 23.26 pixels

200  $\mu\text{m}$  scale bar length = 253 pixels. 0.79 pixels/ $\mu\text{m}$

Crystal width = 0.79 x 23.26  $\mu\text{m}$  = 18.375  $\mu\text{m}$  = 0.018375 mm = 0.0018375 cm

**Table S11: Spectral data for 3E**

| $\nu_{max}$ (cm <sup>-1</sup> )* | F(R) <sub>max</sub> (a.u.) | $\Delta\nu_{1/2}$ (cm <sup>-1</sup> ) | $\Delta\nu_{1/2}^0$ (cm <sup>-1</sup> ) | $\epsilon$ (M <sup>-1</sup> cm <sup>-1</sup> ) | H <sub>ab</sub> (cm <sup>-1</sup> ) |
|----------------------------------|----------------------------|---------------------------------------|-----------------------------------------|------------------------------------------------|-------------------------------------|
| 6945(127)                        | 0.1152(0.06)               | 2567(137)                             | 4005.365                                | 35(20)                                         | 136(46)                             |
| 7690                             | 0.11921                    | 2370                                  | 4214.724                                |                                                |                                     |
| 9264                             | 0.45257                    | 1513                                  | 4625.996                                |                                                |                                     |
| 10100                            | 0.79299                    | 1108                                  | 4830.217                                |                                                |                                     |
| 14853                            | 4.46822                    | 3893                                  | 5857.511                                |                                                |                                     |
| 19103                            | 1.65525                    | 3333                                  | 6642.886                                |                                                |                                     |
| 24666                            | 5.31622                    | 9007                                  | 7548.408                                |                                                |                                     |

### Information for Marcus hush analysis of 1E

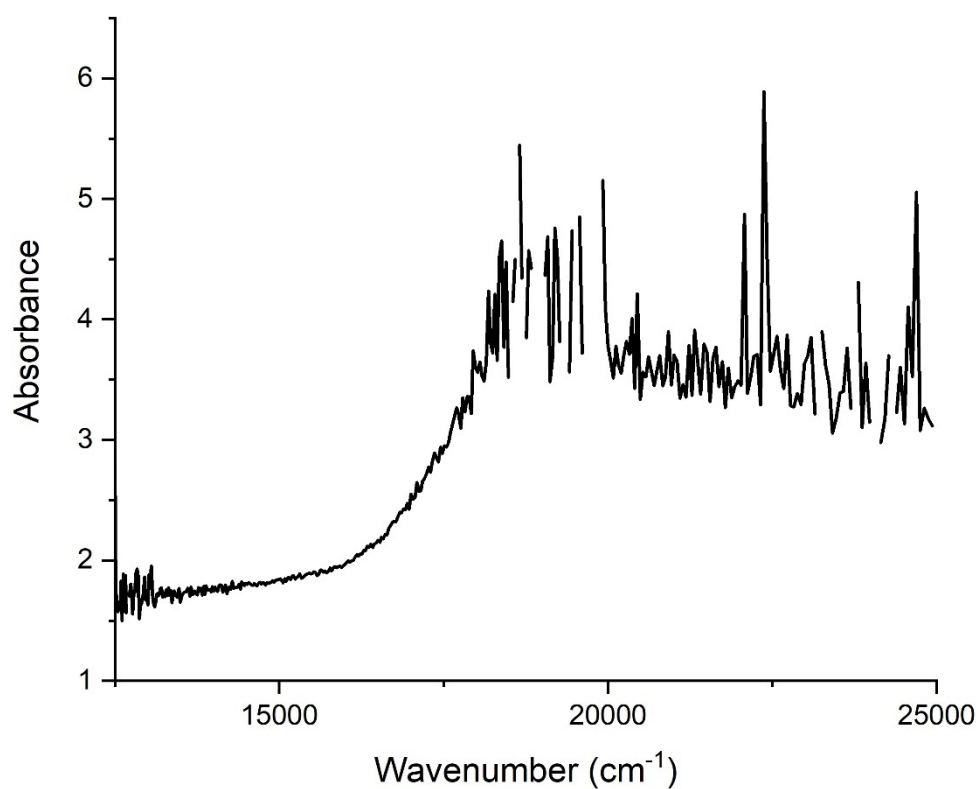

**Figure S40: SC-UV-Vis spectrum of 1E from horizontally polarised light**

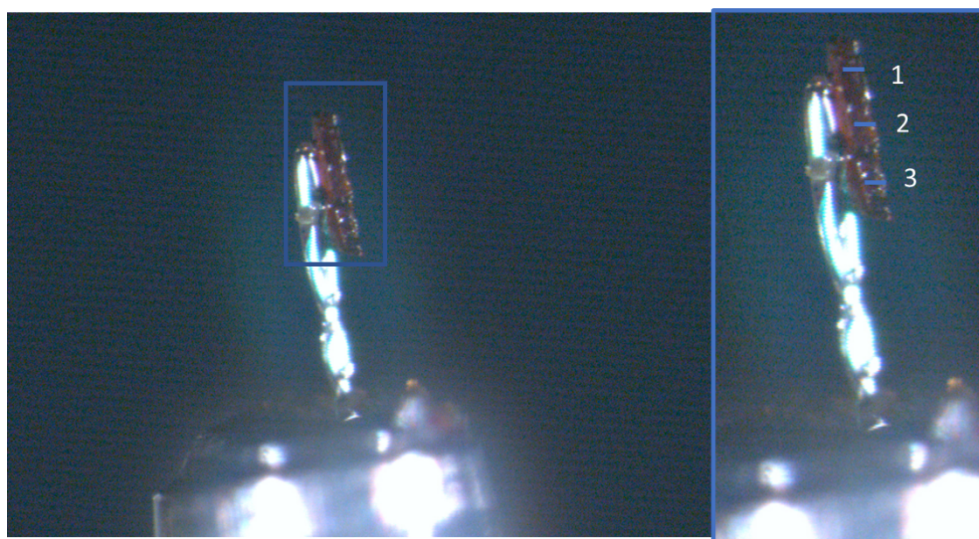

**Figure S41: Crystal images of 1E used to measure the width of the crystal**

Scale bar length 100 micron= 102.044 pixels 0.980 microns/pixel

3 measurements from crystal 1. 32.242 pixels 2. 30.594 pixels 3. 31.048 pixels av = 31.294

Crystal width = 30.67 microns. = 0.03067mm = 0.003067 cm

**Table S12: Spectral data for 1E**

| $\nu_{max}$ (cm <sup>-1</sup> )* | F(R) <sub>max</sub> (a.u.) | $\Delta\nu_{1/2}$ (cm <sup>-1</sup> ) | $\Delta\nu_{1/2}^0$ (cm <sup>-1</sup> ) | $\epsilon$ (M <sup>-1</sup> cm <sup>-1</sup> ) | H <sub>ab</sub> (cm <sup>-1</sup> ) |
|----------------------------------|----------------------------|---------------------------------------|-----------------------------------------|------------------------------------------------|-------------------------------------|
| 6012(33)                         | 0.27(0.06)                 | 1313(97)                              | 1791                                    | 205(60)                                        | 218(42)                             |
| 7377                             | 0.25469                    | 1437                                  | 1821                                    |                                                |                                     |
| 9458                             | 1.13392                    | 2608                                  | 2454                                    |                                                |                                     |
| 10671                            | 0.68029                    | 1333                                  | 1754                                    |                                                |                                     |
| 14996                            | 0.98449                    | 2180                                  | 2244                                    |                                                |                                     |
| 15197                            | 0.28727                    | 5509                                  | 3567                                    |                                                |                                     |
| 24279                            | 1.22883                    | 9993                                  | 4804                                    |                                                |                                     |

**Additional Structure-Activity Relationship Plots**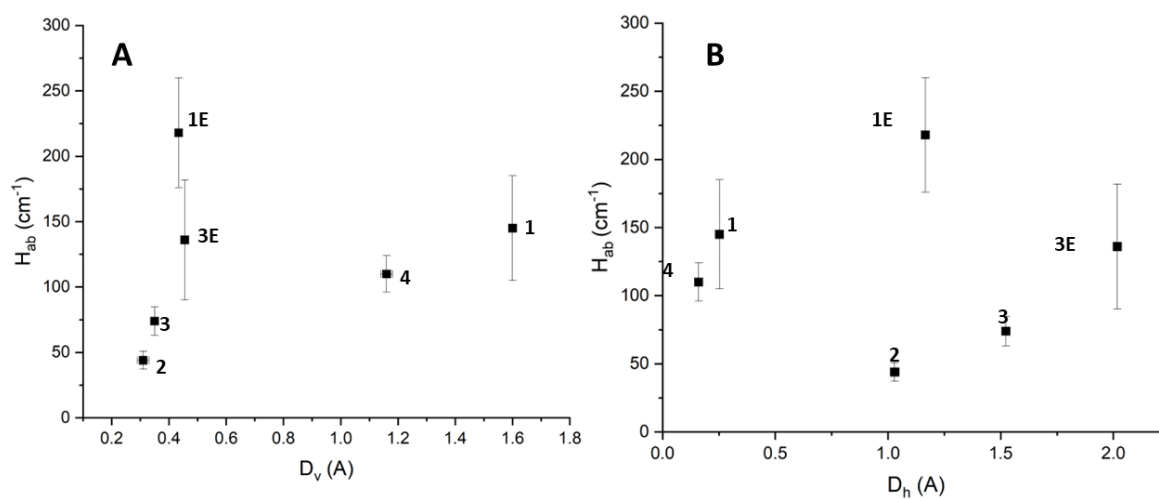**Figure S42: Effect of vertical (B) and horizontal (A) offsets on the  $H_{ab}$  of the low energy IVCT transition.**

**Table S13: Compiled SEC-UV-Vis data as was used for the  $H_{ab}$  calculation**

|                                                                                             | 6000 $\text{cm}^{-1}$ IVCT transition |                         |                             |                        |                        |                             | 10,000 $\text{cm}^{-1}$ IVCT transition |                         |                             |                        |                        |                             |
|---------------------------------------------------------------------------------------------|---------------------------------------|-------------------------|-----------------------------|------------------------|------------------------|-----------------------------|-----------------------------------------|-------------------------|-----------------------------|------------------------|------------------------|-----------------------------|
|                                                                                             | 1                                     | 1E                      | 2                           | 3                      | 3E                     | 4                           | 1                                       | 1E                      | 2                           | 3                      | 3E                     | 4                           |
| <b>Crystal Width (cm)</b>                                                                   | 0.0013<br>$\pm$<br>0.0001             | 0.00283<br>$\pm$ 0.0004 | 0.00112<br>$\pm$<br>0.00007 | 0.0016 $\pm$<br>0.0001 | 0.0018 $\pm$<br>0.0002 | 0.00118<br>$\pm$<br>0.00008 | 0.0013 $\pm$<br>0.0001                  | 0.00283<br>$\pm$ 0.0004 | 0.00112<br>$\pm$<br>0.00007 | 0.0016 $\pm$<br>0.0001 | 0.0018 $\pm$<br>0.0002 | 0.00118<br>$\pm$<br>0.00008 |
| <b>SC-UV-Vis Absorbance</b>                                                                 | 2.18 $\pm$<br>0.48                    | 4.22 $\pm$<br>0.54      | 1.59 $\pm$<br>0.33          | 2.36 $\pm$<br>0.27     | 1.49 $\pm$<br>0.04     | 2.6 $\pm$ 0.4               | 2.18 $\pm$<br>0.48                      | 4.22 $\pm$<br>0.54      | 1.59 $\pm$<br>0.33          | 2.36 $\pm$<br>0.27     | 1.49 $\pm$<br>0.04     | 2.6 $\pm$ 0.4               |
| <b><math>\nu_{\text{max}}</math> (<math>\text{cm}^{-1}</math>)</b>                          | 6479 $\pm$<br>178                     | 6012 $\pm$<br>33        | 6213 $\pm$<br>20            | 6616 $\pm$<br>19       | 6051 $\pm$<br>97       | 6945 $\pm$<br>127           | 9999 $\pm$<br>242                       | 9793 $\pm$<br>259       | 10521 $\pm$<br>58           | 10538 $\pm$<br>149     | 10427 $\pm$<br>92      | 9682 $\pm$<br>127           |
| <b><math>F(R)_{\text{max}}</math></b>                                                       | 0.33 $\pm$<br>0.09                    | 0.27<br>$\pm$ 0.06      | 0.067 $\pm$<br>0.006        | 0.37 $\pm$<br>0.06     | 0.12<br>$\pm$ 0.01     | 0.1152 $\pm$<br>0.0576      | 0.677 $\pm$<br>0.22                     | 0.86<br>$\pm$ 0.25      | 0.33 $\pm$<br>0.01          | 0.313 $\pm$<br>0.06    | 0.49<br>$\pm$ 0.07     | 0.68<br>$\pm$ 0.05          |
| <b><math>\Delta\nu_{1/2}</math> (<math>\text{cm}^{-1}</math>)</b>                           | 1221 $\pm$<br>165                     | 1313 $\pm$<br>97        | 543 $\pm$ 51                | 945 $\pm$ 10           | 862 $\pm$<br>137       | 2567 $\pm$<br>137           | 1876 $\pm$<br>260.5                     | 2156 $\pm$<br>370       | 1778 $\pm$<br>597           | 1397 $\pm$<br>278      | 1844 $\pm$<br>740      | 2302 $\pm$<br>137           |
| <b>SC-UV-Vis <math>\epsilon</math></b>                                                      | 1074 $\pm$<br>321                     | 1753 $\pm$<br>478       | 1000 $\pm$<br>271           | 1136 $\pm$<br>208      | 1035 $\pm$<br>93       | 1128 $\pm$<br>303           | 1074 $\pm$<br>321                       | 1753 $\pm$<br>478       | 1000 $\pm$<br>271           | 1136 $\pm$<br>208      | 1035 $\pm$<br>93       | 1128 $\pm$<br>302           |
| <b>IVCT <math>\epsilon</math> (<math>\text{mol}^{-1}\text{L}^{-1}\text{cm}^{-1}</math>)</b> | 91 $\pm$ 34                           | 222 $\pm$ 69            | 19 $\pm$ 4                  | 67 $\pm$ 16            | 37 $\pm$ 4             | 35 $\pm$ 20                 | 248 $\pm$ 78                            | 653 $\pm$<br>228        | 91 $\pm$ 14                 | 68 $\pm$ 18            | 150 $\pm$ 26           | 209 $\pm$ 41                |
| <b>Cofacial Distance (<math>\text{\AA}</math>)</b>                                          | 3.782 $\pm$<br>0.004                  | 3.318 $\pm$<br>0.004    | 3.9 $\pm$ 0.6               | 3.78 $\pm$<br>0.005    | 3.482 $\pm$<br>0.003   | 3.45029<br>$\pm$<br>0.00013 | 3.782 $\pm$<br>0.004                    | 3.318 $\pm$<br>0.004    | 3.9 $\pm$ 0.6               | 3.78 $\pm$<br>0.005    | 3.482 $\pm$<br>0.003   | 3.45 $\pm$<br>0.0001        |
| <b><math>H_{ab}</math> (<math>\text{cm}^{-1}</math>)</b>                                    | 145 $\pm$ 40                          | 227 $\pm$ 47            | 44 $\pm$ 7                  | 110 $\pm$ 14           | 75 $\pm$ 11            | 136 $\pm$ 46                | 321 $\pm$ 97                            | 637 $\pm$<br>177        | 221 $\pm$ 53                | 171 $\pm$ 41           | 291 $\pm$ 86           | 370 $\pm$ 51                |

Crystal width is the measured width of each of the crystals under a light microscope. SC-UV-Vis absorbance is the measure absorbance from the single crystal UV-Vis experiment.  $\nu_{\text{max}}$  is the peak position of the IVCT band of interest.  $F(R)_{\text{max}}$  is the maximum observed absorbance for the IVCT band of interest.  $\Delta\nu_{1/2}$  is the full width at half maximum for the IVCT band of interest. SC-UV-Vis  $\epsilon$  is the absorption coefficient calculated from the single crystal UV-Vis experiment. IVCT  $\epsilon$  is the adjusted absorption coefficient adjusted to correspond to the IVCT band of interest. Cofacial distance is the distance between interacting TTF groups as measured in OLEX.  $H_{ab} = [0.0205 \times (\nu_{\text{max}}\epsilon \Delta\nu_{1/2})^{1/2}]/r$ , where  $\epsilon$  is the extinction coefficient of the IVCT band.

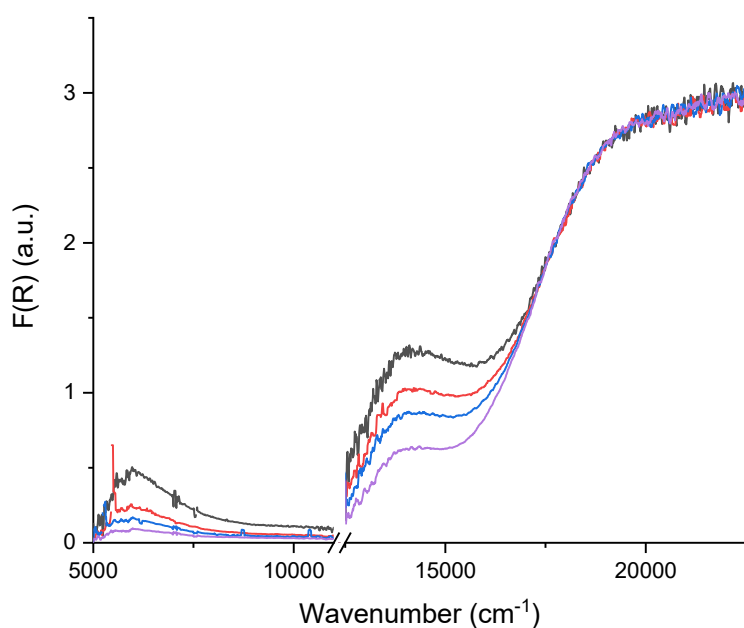

**Figure S43: UV-Vis spectrum of 1E after the oxidising potential has been removed for 90 s (black), 180 s (red), 270 s (blue), and 450 s (purple).**

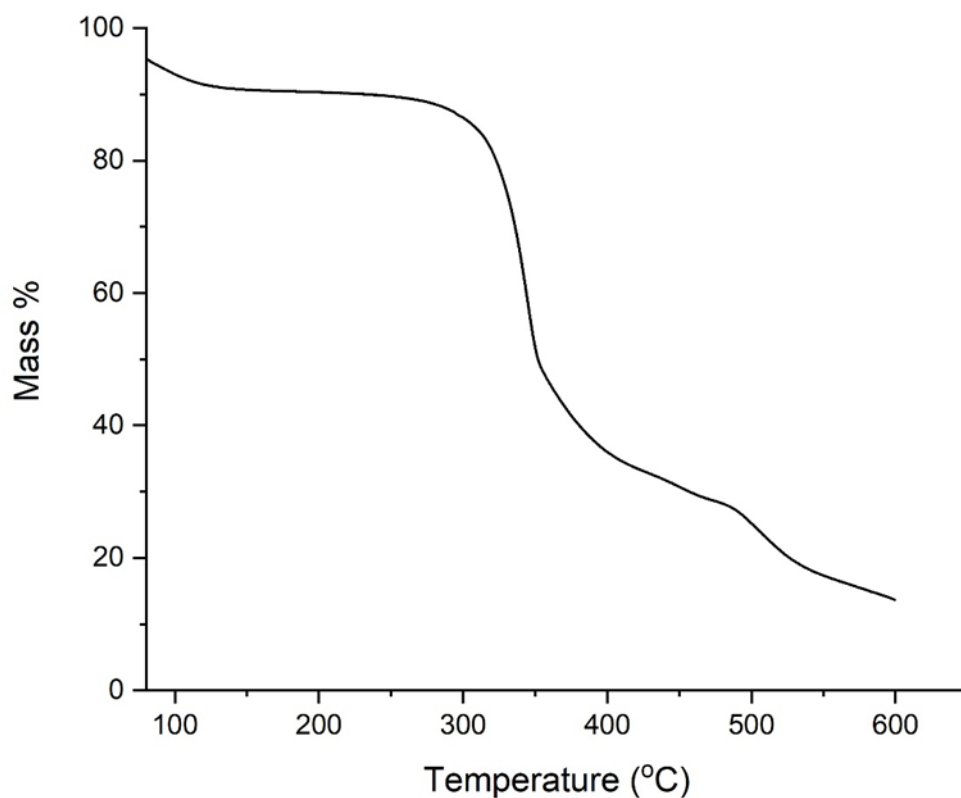

**Figure S44: TGA decomposition curve of Framework 1. Data was collected under an N<sub>2</sub> flow of 20 mLmin<sup>-1</sup> at a scan rate of 5 °Cmin<sup>-1</sup>.**

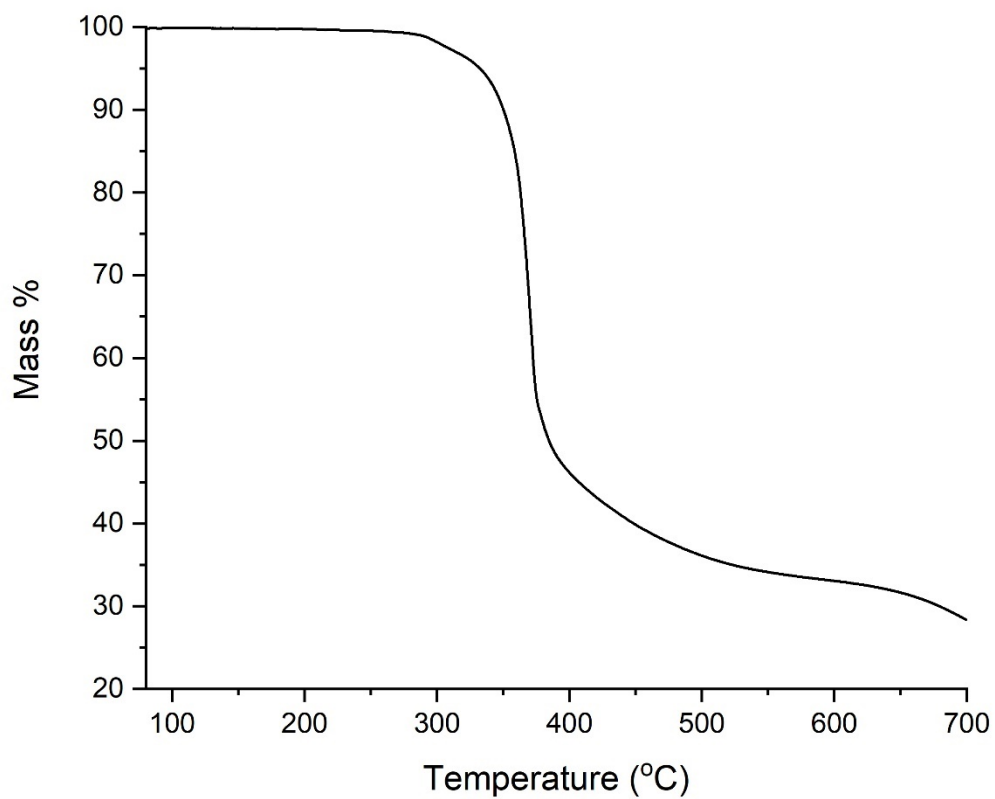

**Figure S45: TGA decomposition curve of Framework 1E. Data was collected under an N<sub>2</sub> flow of 20 mLmin<sup>-1</sup> at a scan rate of 5 °Cmin<sup>-1</sup>.**

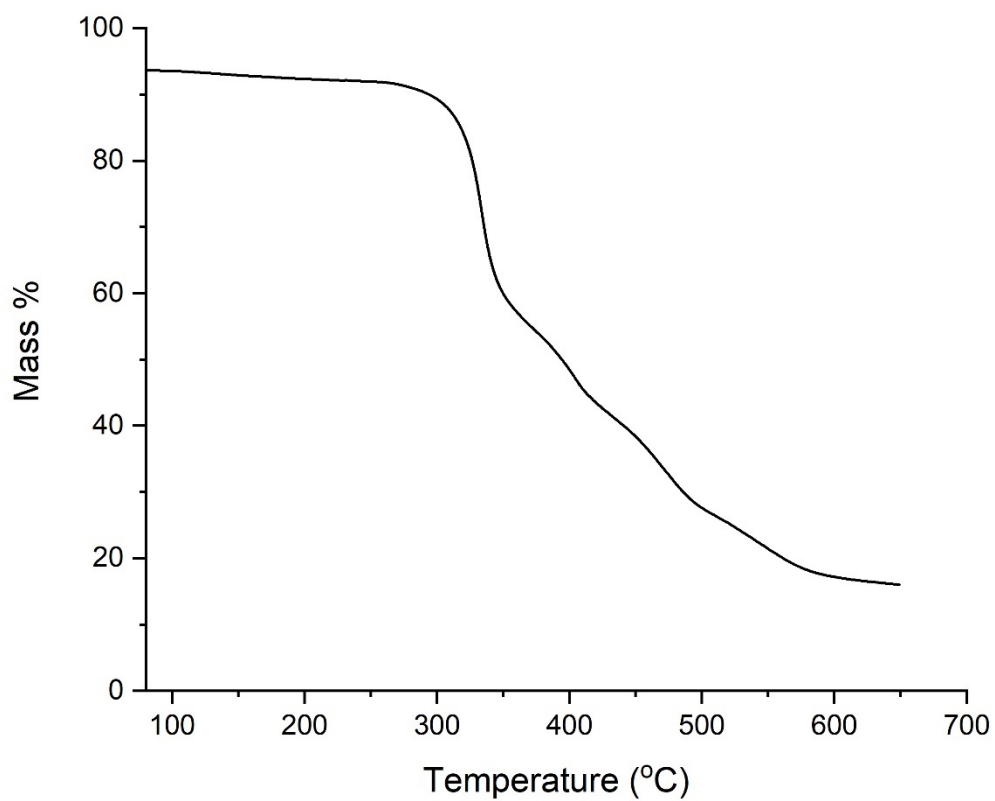

**Figure S46: TGA decomposition curve of Framework 2. Data was collected under an N<sub>2</sub> flow of 20 mLmin<sup>-1</sup> at a scan rate of 5 °Cmin<sup>-1</sup>.**

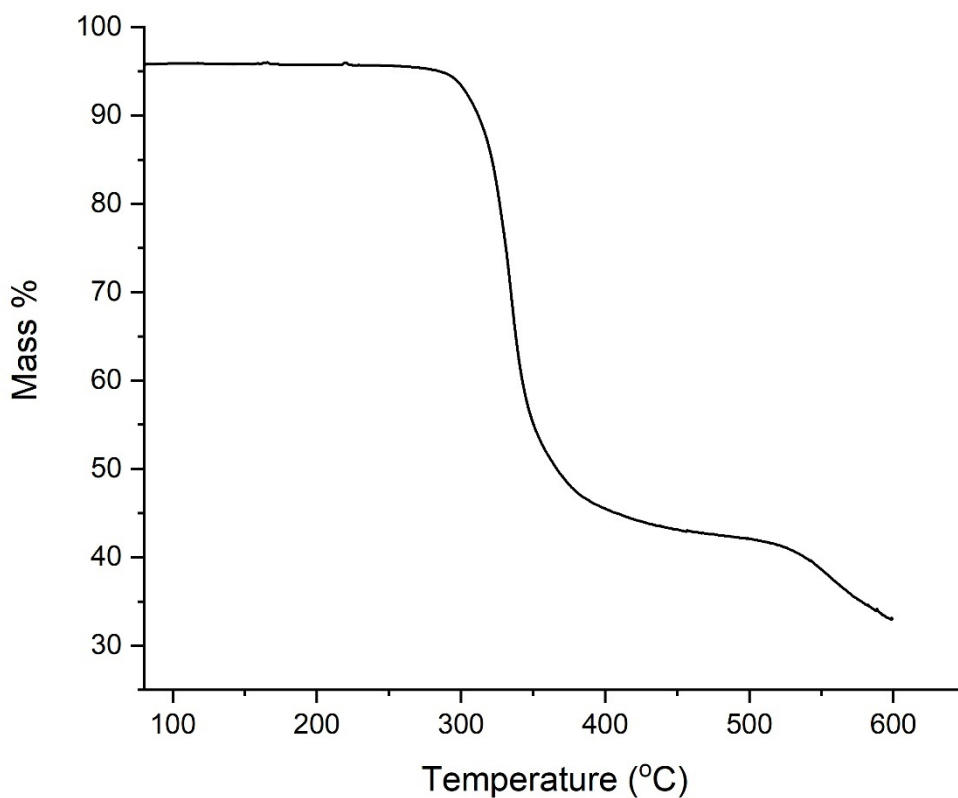

**Figure S47: TGA decomposition curve of Framework 3. Data was collected under an N<sub>2</sub> flow of 20 mLmin<sup>-1</sup> at a scan rate of 5 °Cmin<sup>-1</sup>.**

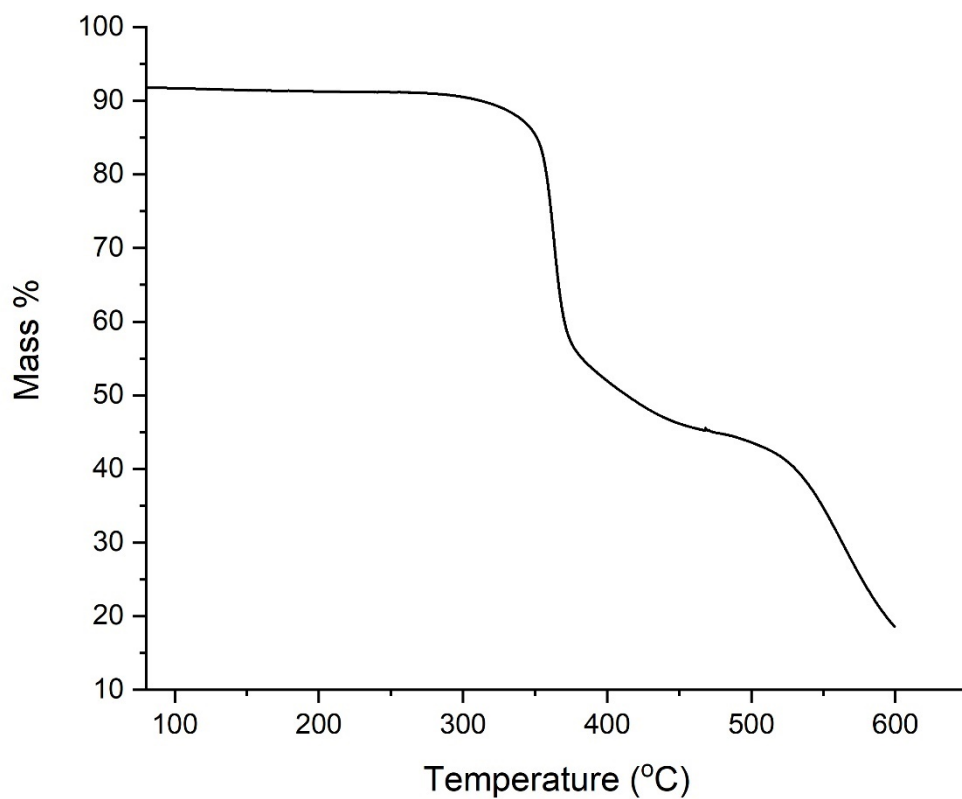

**Figure S48: TGA decomposition curve of Framework 3E. Data was collected under an N<sub>2</sub> flow of 20 mLmin<sup>-1</sup> at a scan rate of 5 °Cmin<sup>-1</sup>.**



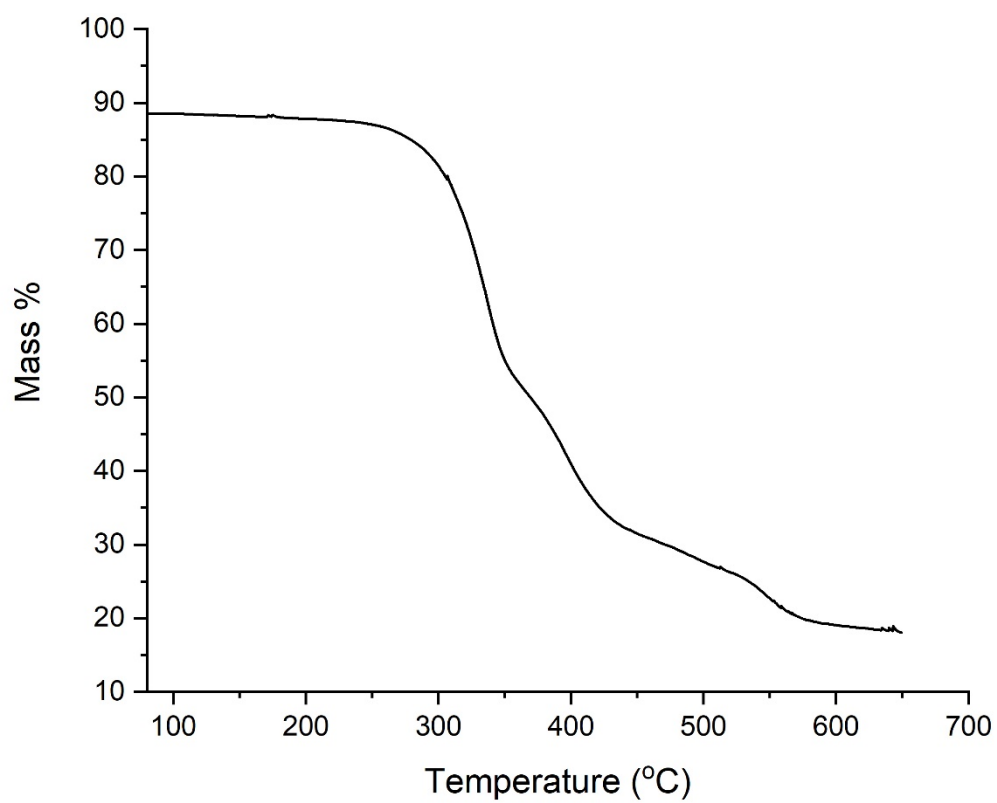

**Figure S49: TGA decomposition curve of Framework 3E. Data was collected under an N<sub>2</sub> flow of 20 mLmin<sup>-1</sup> at a scan rate of 5 °Cmin<sup>-1</sup>.**
